1 **One Health Assessment of an Urban Temporary Settlement Reveals**  
2 **Gut Microbiome Serving as Antimicrobial Resistance Gene**  
3 **Reservoir**

4  
5 Rajindra Napat<sup>1,2\*</sup>, Anupama Gurung<sup>1,\*</sup>, Ajit Poudel<sup>1</sup>, Prajwol Manadhar<sup>1</sup>, Ashok B. Chaudhary<sup>1</sup>, Ajay  
6 Narayan Sharma<sup>1</sup>, Samita Raut<sup>1</sup>, Saman Man Pradhan<sup>1</sup>, Jyotsna Joshi<sup>1</sup>, Mathilde Poyet<sup>3</sup>, Mathieu  
7 Groussin<sup>3</sup>, Rajesh M. Rajbhandari<sup>1</sup>, Dibesh B. Karmacharya<sup>1,6#</sup>.

8  
9 Affiliation

10 <sup>1</sup> Center for Molecular Dynamics Nepal (CMDN), Kathmandu, Nepal

11 <sup>2</sup> Central Department of Biotechnology, Tribhuvan University, Nepal

12 <sup>3</sup>Massachusetts Institute of Technology, Dept. of Biological Engineering, USA

13 <sup>4</sup>Institute of Clinical Molecular Biology, Kiel University, Kiel, Germany

14 <sup>5</sup>Institute of Experimental Medicine, Kiel University, Kiel, Germany

15 <sup>6</sup>University of Queensland, Department of Biological Sciences, Brisbane, Australia

16

17

18

19

20

21

22

23

24

25

26

27

28

29

30

31

32

33

34 \*First Authorship

35 #Corresponding Author- [dibesh@cmdn.org](mailto:dibesh@cmdn.org)

36 **Abstract**

37

38 Antimicrobial resistance (AMR) is an emerging and growing global health challenge that could result in  
39 10.2 million deaths annually by 2050. The unrestricted and haphazard use of antibiotics is contributing to  
40 the rapid emergence and spread of AMR, and the problem is exacerbated by release of untreated waste  
41 water from high-risk sources like hospitals into rivers. Bacteria often develop resistance through  
42 horizontal gene transfer mechanism and gut flora can act as a source for new Antimicrobial Resistance  
43 Genes (ARG). Upcoming methods like metagenomics can identify the resistance profile (AMR) of gut  
44 microbiome, and detect bacterial infections that otherwise go unnoticed. Our study focused on  
45 understanding the presence of AMR mutations and gene transfer dynamics in human, animal and  
46 environmental samples collected in one of the temporary settlements of Kathmandu (Nepal) using One  
47 Health approach. Current AMR reporting based on clinical cases is limited and does not provide  
48 information on specific pathogen and associated AMR genes- our study is an effort to contribute  
49 information to fulfill this gap.

50 Twenty-one samples were collected from a temporary settlement in Thapathali (Kathmandu), which  
51 included fecal samples from birds (n=3) and humans (n=14), and environmental samples (n=4).  
52 Microbiological assessment was carried out based on 16S sequence metagenomic analysis using MiSeq  
53 (Illumina, USA). Taxonomic classification on obtained 16S sequences were determined by using  
54 Metaphlan 2 and Qiime 2 bioinformatics tools. ShortBRED was used to classify ARG and virulence  
55 factors, and WAFFLE was used for horizontal gene transfer event prediction. The network analysis was  
56 carried out using Gephi v0.9 and the ResistoXplorer web tool to identify ARG in the collected samples.

57 *Prevotella spp.* was the dominant gut microbiome in humans. We detected diverse phages and viruses,  
58 including Stx-2 converting phages. 72 virulence factors and 53 ARG subtypes were detected, with poultry  
59 samples having the highest number of subtypes. The cluster and network analysis showed a strong  
60 association between gut microbiome and ARG, which was also supported by Horizontal Gene Transfer  
61 (HGT) analysis. One-Health interface showed ARG dynamics and revealed gut microbiomes of humans  
62 and animals serving as a reservoir for the circulating ARG.

63

64 Keywords: AMR, ARG, gut-microbiome, HGT, One-health

65

## 66 Introduction

67

68 Antimicrobial resistance (AMR) is an emerging global health challenge (Aarestrup, 2015). The World  
69 Health Organization (WHO) has endorsed a global action plan on AMR surveillance and strategies for  
70 mitigation (WHO, 2015). To date, drug-resistant infections are responsible for over 5 million deaths  
71 annually as per a report published in 2022 (Murray et al., 2022a) and if the looming crisis is not averted,  
72 we might see 100% drug-resistant (superbug) infections, resulting in 10.2 million deaths of working-age  
73 population by 2050 (Anderson et al., 2019; Murray et al., 2022b). Haphazard and unrestrained use of  
74 antibiotics in agricultural and health sectors have caused an emergence of new bacterial populations  
75 carrying and transferring multitude of antibiotic resistant genes (ARG) (Xu et al., 2015; Guo et al., 2017).  
76 One of the emerging sources of AMR has been non-treated or minimally treated hospital wastewater  
77 which gets released into rivers (Fouz et al., 2020), such is the case with the majority of the hospitals in  
78 Kathmandu (Nepal) (Thakali et al., 2021a). Many of the temporary settlements (slums), including our  
79 study site, have been exposed to such untreated wastewater from nearby hospitals.

80 Bacteria often develop AMR resistance through Horizontal Gene Transfer (HGT) and ARG are acquired  
81 from related or distant species. Mobile genetic elements (MGEs) within bacterial cells like plasmids,  
82 integrons and transposons are enhanced by recombination mechanisms like conjugation, transduction and  
83 transformation (Murray et al., 2022b). Reservoirs of ARG found in microbial communities in humans,  
84 animals and environment are crucial in propagation of AMR (Forsberg et al., 2014). Gut flora is  
85 responsible for overall health of mammalian species, including its important role in boosting host immune  
86 system and enhancing nutrition acquisition (Anthony et al., 2021). Antibiotics create a disharmony in gut  
87 ecosystems by altering their functional and taxonomic composition, enabling colonization by  
88 opportunistic pathogens (Sorbara and Pamer, 2019).

89 Metagenomics has become an important tool to profile AMR of gut microbiome (Hendriksen et al., 2019)  
90 and to identify various environmental niche that may be source of dissemination of AMR bacteria and  
91 resistance mechanism (Fitzpatrick and Walsh, 2016). Using next generation sequencing (NGS) data of  
92 short targeted biomarker reads, metagenomics techniques enable quantification of large number of  
93 transmissible resistance genes (Miller et al., 2013). Metagenomics is a relatively new and emerging  
94 method, and since its first published application in 2010, more cost effective NGS platforms have been  
95 developed and are now commercially available. With this technique, we can detect microorganisms  
96 without any presupposition, especially for those infections that are difficult to detect using conventional  
97 diagnostic tools (Miller et al., 2013; Schlaberg et al., 2017; d'Humières et al., 2021). This technique is  
98 particularly useful in early detection and surveillance of highly infectious zoonotic diseases (Newell et  
99 al., 2010).

100 Disease surveillance, including AMR, is mostly based on reports submitted by clinical or laboratory  
101 outlets (Gibbons et al., 2014). Covid-19 pandemic has highlighted the importance of a broad but accurate  
102 surveillance of communicable diseases (Assefa et al., 2022; Basseal et al., 2022). Detection and  
103 monitoring of virulence factors can be particularly useful in understanding public health risks of potential  
104 infections as virulence factors are often associated with the ability of bacteria or virus to adhere, colonize,  
105 invade and sequester nutrients from hosts (Sharma et al., 2017) and increase their pathogenicity (Miller et  
106 al., 2013). HGT is a mechanism through which bacteria evolve by transferring genetic information such  
107 as AMR, virulence and functional genes between cells (Burmeister, 2015). In this study, we have  
108 analyzed samples collected from humans, animals and environment in a high risk urban site located in  
109 Kathmandu; and detected AMR genes in bacteria, determined their virulence factors and HGT.

110

111

112

## 113 Material and methods

114

### 115 Study site

116

117 This study site is a temporary settlement located in Thapathali, Kathmandu (Figure ). With an estimated  
118 population of 661, this settlement is situated in the banks of the Bagmati River and located in the middle  
119 of a highly dense and urbanized part of the Kathmandu valley. Two large hospitals, the Paropakar  
120 Maternity and Women's Hospital and Norvic Hospital, are situated within 200 meters of the sampling  
121 site. Untreated wastewater from the hospitals are discharged into the nearby Bagmati river.  
122

123 We collected samples from birds [n=3, fecal; chicken, *Gallus gallus domesticus*, n=1, common quails,  
124 *Coturnix coturnix*, n=2], humans (n=14, fecal), and environmental samples [n=4; water (n=2), soil (n=1),  
125 and river bed sediments (n=1)].  
126

127 Ethical approval for the study was obtained from the Nepal Health Research Council (Reg. No.  
128 792/2018).  
129

130

131

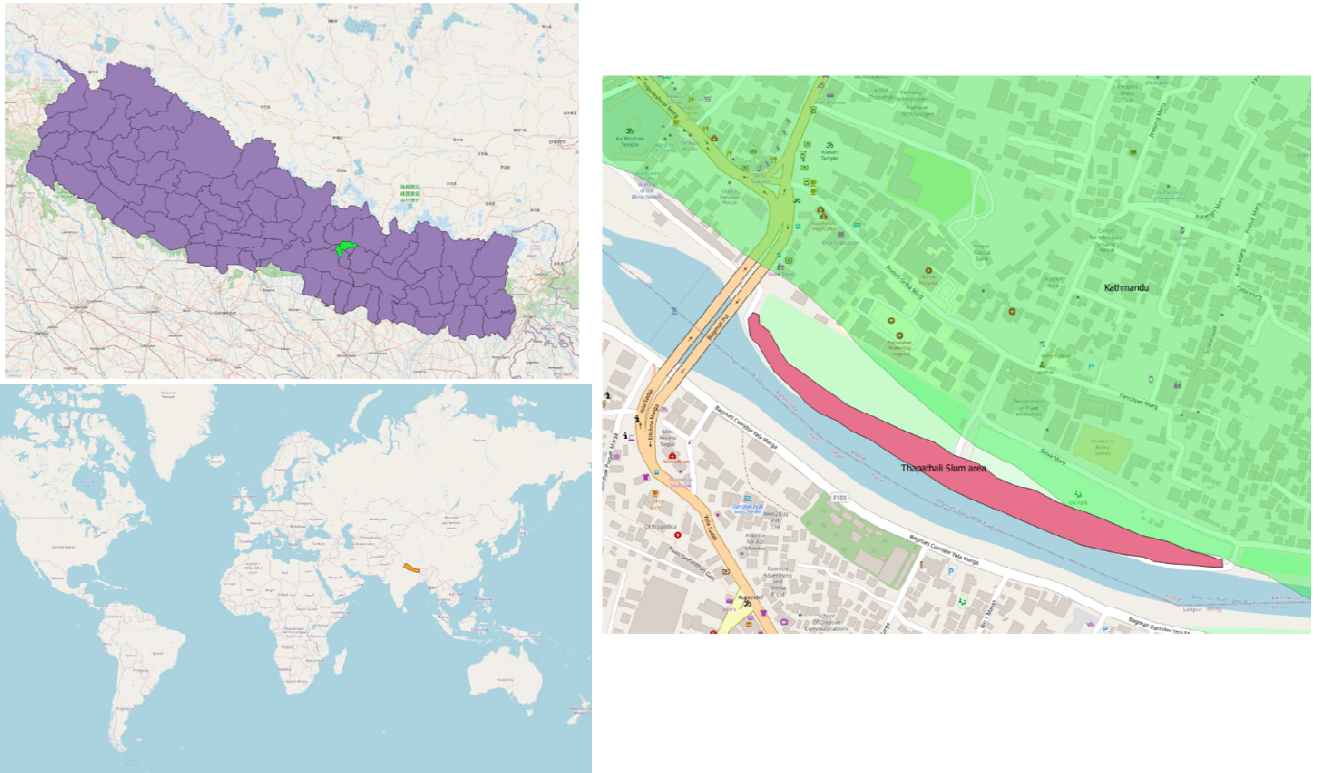

132

133 **Figure 1: The study site- Thapathali temporary settlement, located in the Kathmandu metropolitan**  
134 **city.** The map was created using QGIS (an open-source GIS platform) using base maps from  
OpenStreetMap contributors (25) and shape files from OpendataNepal.com (26)

135

## 136 **Sample Collection and DNA extraction**

137

138 River water samples were collected in May (2019) using electric auto-sampler (Biobot Analytics Inc,  
139 USA). Five hundred milliliter (ml) gab and sediment sample were collected in zip lock bags using sterile  
140 plastic spatula. Written consent were obtained from the participating residents and structured  
141 questionnaires were used for survey. The humans and domestic animals (chicken and quails) fecal  
142 samples were collected in sterile plastic stool containers. The fecal samples were then transferred into two  
143 individual vials containing 5ml RNAlater (Thermo Fisher Scientific, USA) and Glycerol respectively and  
144 were homogenized uniformly. From 5ml of homogenized solution, 1 ml solution was transferred to each  
145 five 2ml cryovials. 1L of ground water was collected in a sterile screw capped bottle, and soil samples  
146 were collected in zip lock bags avoiding surface debris. The samples were labeled with unique identity  
147 code and GPS of site and sample collected were recorded. The samples were transported immediately to  
148 the laboratory in cold chain box maintaining temperature between 2-8° Celsius.

149

150 DNA was extracted from fecal samples using the QIAamp Fast DNA Stool Mini Kit (Qiagen, Germany)  
151 following manufacturer's instructions. For environmental samples, DNA was extracted using the  
152 PowerSoil DNA isolation kit (MO BIO Laboratories Inc., USA). DNA concentration was measured using  
153 a Qubit™ 3 Fluorometer (Invitrogen, USA). The integrity and size of the extracted DNA were examined  
154 with electrophoresis in 0.8% agarose gel.

155

## 156 **16S rRNA sequencing**

157

158 16S rRNA gene was amplified using archaeal and bacterial primers (515F and 806R), targeting V3 and  
159 V4 regions (Caporaso et al., 2011). The PCR products were quantified using Qubit™ 3 Fluorometer,  
160 multiplexed at even concentration and sequenced on 600 bp (2 x 300bp) pair-end using Illumina MiSeq  
161 platform (Illumina, Inc., USA) (EMP 16S Illumina Amplicon Protocol, n.d.).

162

## 163 **Metagenomic library preparation and sequencing**

164

165 1 ng of genomic DNA from each sample was used with Illumina MiSeq Nextera XT DNA Library  
166 Preparation Kit (Illumina, Inc., USA), the paired-end library was constructed with an insert (500 bp) for  
167 all 21 samples. DNA was cleaned by AMPure XP beads (Agentcourt, USA) and tagmented and indexed  
168 using Nextera XT Index Kit (Illumina, Inc., USA). Clean DNA was again quantified and evaluated using  
169 Qubit (Invitrogen, USA) and Agilent bioanalyzer DNA 1000 kit (Agilent Technologies, UK). Finally, all  
170 samples were pooled at 4 nm concentration and paired-end [300bp (2 x 151bp)] sequenced in MiSeq  
171 platform (Illumina, USA).

172

173

## 174 **Data analysis**

175

### 176 **16s rRNA bacterial taxonomic profiling**

177

178 Data were analyzed using the QIIME version 2.0 pipeline. Raw sequences were de-multiplexed and then  
179 quality-filtered using DADA2 in QIIME. Sequences were then clustered into Operational Taxonomic  
180 Units (OTUs, 99% similarity) with USEARCH using the open reference clustering protocol (Amplicon  
181 analysis with QIIME2 - VL microbiome project, n.d.). The Silva\_132\_release database was used to assign  
182 taxonomy and resulting OTU table was then rarefied based on alpha rarefaction of 21,383 reads per  
183 sample.

184

### 185 **Metagenomic taxonomic profiling**

186 The metagenomic phylogenetic analysis was done using tool- MetaPhlAn V 3.0  
187 (<https://github.com/biobakery/MetaPhlAn>). The analysis was performed as described in the manual of  
188 MetaPhlAn V 3.0 to run an analysis (<https://github.com/biobakery/MetaPhlAn/wiki/MetaPhlAn-3.0>)  
189 (MetaPhlAn 3.0 · biobakery/MetaPhlAn Wiki · GitHub, n.d.).

190

### 191 **Virulence factor and antimicrobial resistance gene (ARG) analysis**

192 The shotgun sequence data was used to analyze AMR and Virulence factor (VF) gene using tool  
193 ShortBRED (Kaminski et al., 2015). Antibiotic Resistance Database (ARDB) markers and Virulence  
194 Factors Database (VFDB) markers were used in the analysis, which is the default database present in  
195 ShortBRED tools. Similar to the MetaPhlAn, manual of ShortBRED was used to perform the analysis  
196 (<https://github.com/biobakery/shortbred>) (GitHub - biobakery/shortbred: ShortBRED is a pipeline to take  
197 a set of protein sequences, reduce them to a set of unique identifying strings (“markers”), and then search  
198 for these markers in metagenomic data and determine the presence and abundance of the, n.d.).  
199 Antimicrobial abundance data were visualized using ResistoXplorer web platform (Dhariwal et al., 2021).

200

### 201 **Horizontal gene transfer (HGT) Analysis**

202 The horizontal gene transfer event was predicted using the tool WAAFLE [43] in default taxonomy  
203 database and following the prescribed manual (<https://github.com/biobakery/waafle>) (GitHub -  
204 biobakery/waafle: WAAFLE (a Workflow to Annotate Assemblies and Find LGT Events) is a method for  
205 finding novel LGT (Lateral Gene Transfer) events in assembled metagenomes, including those from  
206 human microbiomes., n.d.).

207

### 208 **Network analysis**

209 Network analysis was performed on AMR relative abundance data obtained through ShortBRED and  
210 loaded to Gephi V 0.92- association between detected ARG in various assessed samples were then  
211 visualized. Additionally, Association Network analysis was obtained using integration analysis of AMR  
212 and taxonomic data on the ResistoXplorer Web platform. The analysis was carried out under sequence  
213 abundance cutoff=10%, correlation co-efficient cutoff=0.6, adjusted P=0.05 and 1000 permutations.



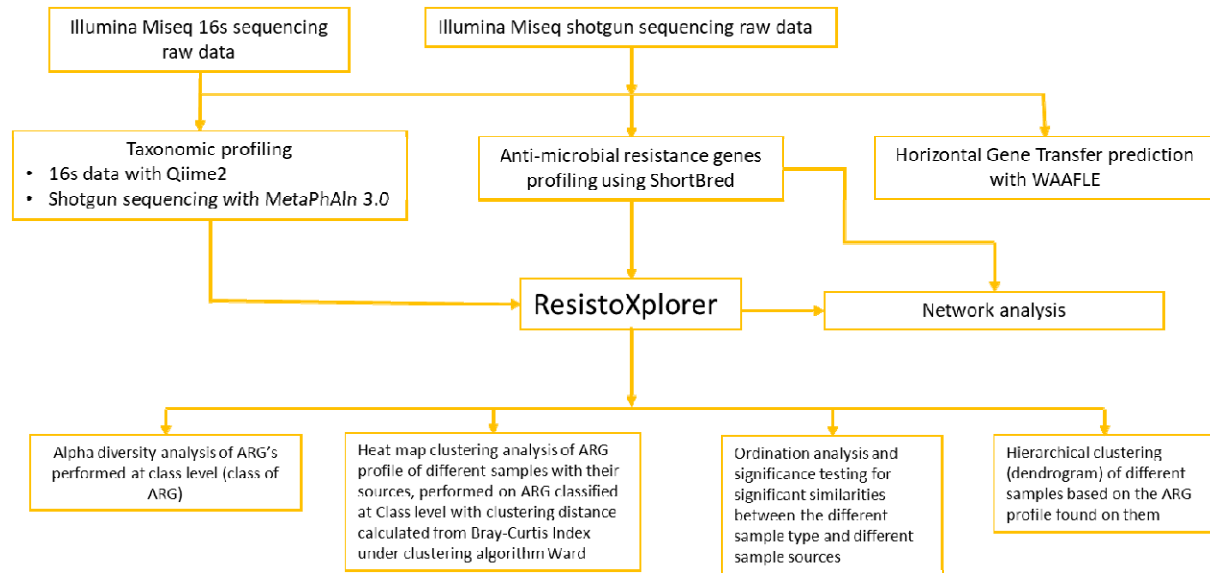

214

215 **Figure 1:** Bioinformatics data analysis workflow used in this study to determine bacterial taxonomic  
216 profiles, virulence factors, Antimicrobial Resistance Genes (ARG), Horizontal Gene Transfer (HGT) and  
217 AMR associated network analysis.

218

## 219 Results

220 Only 11 samples (8 humans and 3 birds fecal samples) yielded 16s rRNA sequencing data. Our Shotgun  
221 metagenomics approach generated 29,000 to 2.1 million reads per sample. However, one sample only had  
222 few hundred reads (water sample-EW70) and was considered a sequencing failure. All raw data was  
223 submitted to the NCBI under Bio-project PRJNA881338.

224

### 225 16s rRNA bacterial and metagenomic taxonomic profiling

226

227 We identified various genera of bacteria (Supplementary table 1) and phages (

228 Table 1). Taxonomic classification of bacterial phylum rank showed dominance of phylum *Firmicutes*  
 229 and *Bacteroidetes* in human samples, *Firmicutes* and *Proteobacteria* in fowl samples and *Bacteroidetes*  
 230 and *Proteobacteria* in the environmental samples (Supplementary Table 2).

231

232 **Bacteria profile in various samples**

233

234 Genus *Prevotella* and *Escherichia* were the most prevalent bacteria found in the human samples. Other  
 235 bacterial species present belonged to genus *Lachnospira*, *Roseburia*, *Eubacterium*, *Faecalibacterium*,  
 236 *Bacteroides* and *Butyrivibrio* (Supplementary Table 1). 16s data revealed genus *Agathobacter*,  
 237 *Bacteroides*, *Prevotella*, *Escherichia*, *Clostridium*, *Streptococcus*, *Blautia*, *Lachnospira*,  
 238 *Faecalibacterium*, *Dorea* and *Roseburia* were abundant, along with presence of more than 50 other  
 239 bacteria genera in the human samples (Supplementary Table 2). According to both 16s and shotgun  
 240 sequencing data, bacterial population showed more variance in human samples than birds and  
 241 environmental samples. Bird samples were dominated by genus *Lawsonia*, *Escherichia*, *Gallibacterium*,  
 242 *Helicobacter* and *Chlamydia*, in addition to the presence of other genera (Supplementary: Table 1 and 2).  
 243 Environmental samples were dominated by presence of some well characterized environmental bacterial  
 244 genus such as *Pseudomonas*, *Aeromonas*, *Acinetobacter*, and *Acrobacter* (Figure 2).

245 Besides these gut microbiomes, bacteria associated with human health such as *E. coli*, *Campylobacter*,  
 246 *Shigella* and *Haemophilus* were also detected. Poultry pathogens- *Chlamydia gallinacea*, *Gallibacterium*  
 247 *anatis* and *Helicobacter pullorum* were found in poultry samples. Aside from pathogenic organisms,  
 248 known probiotic organisms such as *Lactobacillus johnsonii*, *Lactobacillus agilis*, *Lactobacillus reuteri*  
 249 and *Lactobacillus salivarius* were also found in the bird samples.

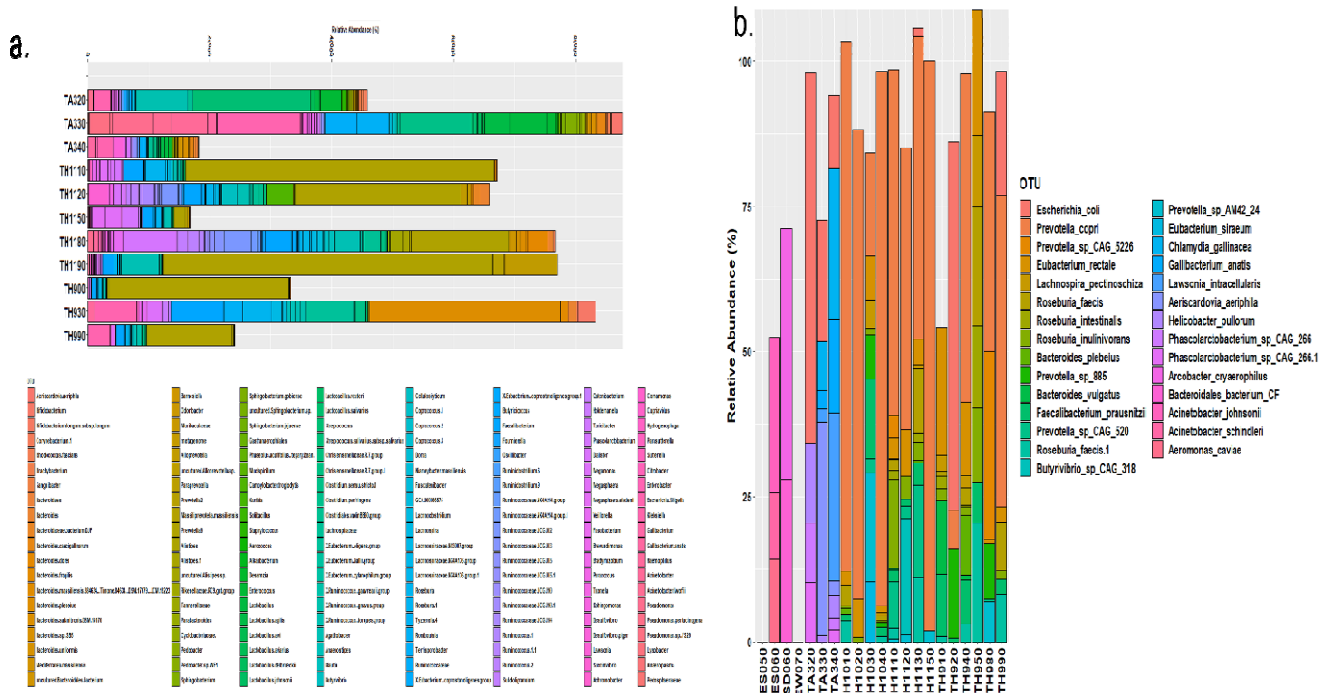

250 **Figure 2:** Detected bacterial phylum in various samples based on- A) 16s rRNA sequencing and B)  
 251 Shotgun sequencing obtained from MetaPhlan V2.0. The plots were generated using ggplot2 in R studio  
 252 2022.07.1 Build 554

254



255 **Taxonomic profile of Virus (Phages)**

256

257 Taxonomic classification of virus family revealed the dominance of family *Siphoviridae*, followed by  
258 *Podoviridae* (Figure 3), both belonging to the order *Caudovirales*. Majority of the viruses were various  
259 phages of *Enterobacteriaceae* family- *Escherichia phage*, *Salmonella phage*, and *Klebsiella phage* (

260 Table 1). Phage diversity were highest in the human samples compared to poultry and environmental  
261 samples. In birds and humans, *Escherichia* phage along with Stx-2 converting phage that carries shiga  
262 toxin genes were found in greater numbers compared to the environmental samples. In environmental  
263 samples, *Planktothrix* phage PaV LD, *Lactococcus* phage P087 and *Achloplasma* virus L2 that infect  
264 environmental bacteria were abundant. Furthermore, in human samples, as expected phages of gut  
265 microbiome and gut pathogen were abundantly detected (

266 Table 1).

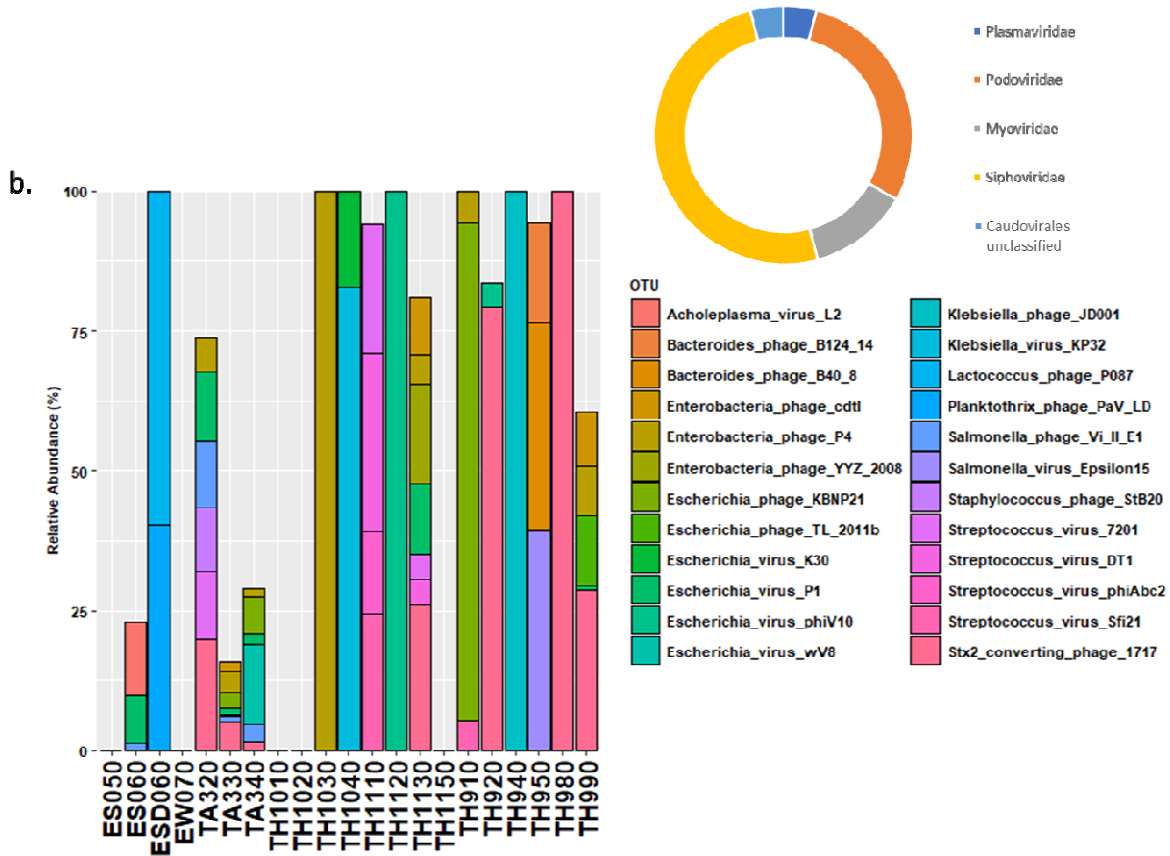

267  
 268 **Figure 3:** Prevalence of virus family in the samples obtained from metagenomic sequencing data. A) Family wise distribution of viruses (phage) detected B) Various phages detected in different samples; The  
 269 Bar plot was generated using ggplot2 in R studio 2022.07.1 Build 554 with R version 4.2.0.  
 270

271

272

273 **Table 1:** Taxonomic profile of viruses (phage) and their relative abundance of  $\geq 10$  in samples obtained  
 274 through metagenomic sequencing.

| Phage name                    | Family                    | Order        | Sample          | Occurrence in sample (no.) |
|-------------------------------|---------------------------|--------------|-----------------|----------------------------|
| Acholeplasma_virus_L2         | Plasmpviridae             | Caudovirales | Environment     | 1                          |
| Bacteroides_phage_B124_14     | Siphoviridae              | Caudovirales | Human           | 1                          |
| Bacteroides_phage_B40_8       | Siphoviridae              | Caudovirales | Human           | 1                          |
| Enterobacteria_phage_cdtI     | Siphoviridae              | Caudovirales | Human           | 1                          |
| Enterobacteria_phage_P4       | Caudovirales unclassified | Caudovirales | Human           | 1                          |
| Enterobacteria_phage_YYZ_2008 | Siphoviridae              | Caudovirales | Human           | 1                          |
| Escherichia_phage_KBNP21      | Podoviridae               | Caudovirales | Human           | 1                          |
| Escherichia_phage_TL_2011b    | Podoviridae               | Caudovirales | Human           | 1                          |
| Escherichia_virus_K30         | Podoviridae               | Caudovirales | Human           | 1                          |
| Escherichia_virus_P1          | Myoviridae                | Caudovirales | Human & Poultry | 2                          |
| Escherichia_virus_phiV10      | Podoviridae               | Caudovirales | Human           | 1                          |
| Escherichia_virus_wV8         | Myoviridae                | Caudovirales | Poultry         | 1                          |
| Klebsiella_phage_JD001        | Myoviridae                | Caudovirales | Human           | 1                          |
| Klebsiella_virus_KP32         | Podoviridae               | Caudovirales | Human           | 1                          |
| Lactococcus_phage_P087        | Siphoviridae              | Caudovirales | Human           | 1                          |
| Planktothrix_phage_PaV_LD     | Podoviridae               | Caudovirales | Environment     | 1                          |
| Salmonella_phage_Vi_II_E1     | Siphoviridae              | Caudovirales | Environment     | 1                          |
| Salmonella_virus_Epsilon15    | Podoviridae               | Caudovirales | Human           | 1                          |
| Staphylococcus_phage_StB20    | Siphoviridae              | Caudovirales | Poultry         | 1                          |
| Streptococcus_virus_7201      | Siphoviridae              | Caudovirales | Human & Poultry | 2                          |
| Streptococcus_virus_DT1       | Siphoviridae              | Caudovirales | Human           | 1                          |
| Streptococcus_virus_phiAbc2   | Siphoviridae              | Caudovirales | Human           | 1                          |
| Streptococcus_virus_Sfi21     | Siphoviridae              | Caudovirales | Human           | 1                          |
| Stx2_converting_phage_1717    | Siphoviridae              | Caudovirales | Human & Poultry | 5                          |

275

276

## 277 Virulence factors profiling

278 Overall, a total of 72 genes that code for virulence factor were detected by shotgun metagenomics  
279 (threshold of 99 % identity and relative abundance of  $\geq 10$ ). Genes coding for toxins, type I to VI secretion  
280 systems, regulatory proteins, adhering proteins, siderophores as well as polysaccharides that compose the  
281 capsules and exhibit anti-phagocytic properties were detected. Virulence factors were detected  
282 predominantly from human samples, followed by poultry samples. *pilT* gene of *Pseudomonas aeruginosa*  
283 was the only gene recovered from the environmental sample (Supplementary 4). Most of the virulence  
284 genes belonged to *Escherichia coli* followed by *Shigella dysenteriae*, *Yersinia pestis* and *Salmonella*  
285 *enterica*. Very unique and specific genes were detected in some bacterial species- *Shigella flexneri*,  
286 *Pseudomonas aeruginosa*, *Legionella pneumophila* and *Yersinia enterocolitica*.

287  
288 We detected genes associated with the toxigenic *E. coli* and *Shigella flexneri* exclusively in the human  
289 samples. These genes include *sat1*, *ltb*, *lta*, *astA* and *senB* which code for accreted auto transporter toxin  
290 of *Enterobacteriaceae*, enterotoxin of *Enterotoxigenic Escherichia coli* (ETEC), heat stable enterotoxin  
291 of *Enteroaggregative E. coli*, and enterotoxin 2 of *Shigella flexneri* respectively (  
292 Table 2).  
293

294 Table 2: Detected toxin coding genes associated with bacteria as obtained through ShortBRED tool.

| VFDB database gene identifier | Virulence genes           | Occurrence in sample | Bacterial species source (according to VFDB) | Description                                                                                    |
|-------------------------------|---------------------------|----------------------|----------------------------------------------|------------------------------------------------------------------------------------------------|
| VFG0902                       | <i>sat</i>                | Human                | <i>Enterobacteriaceae</i>                    | Accreted auto transporter toxin; diarrhea (Liu et al., 2020; Vieira et al., 2020)              |
| VFG1827                       | <i>senB</i>               | Human                | <i>Shigella flexneri</i>                     | <i>Shigella</i> enterotoxin 2; shigellosis (Liu et al., 2020)                                  |
| VFG2038 & VFG2037             | <i>ltb</i> and <i>lta</i> | Human                | <i>E. coli</i>                               | Enterotoxin of Enterotoxigenic <i>Escherichia coli</i> ; diarrhoea                             |
| VFG0863                       | <i>astA</i>               | Human                | <i>E. coli</i>                               | Enterotoxigenic <i>E. coli</i> heat stable enterotoxin (EAST1); diarrhea (Maluta et al., 2017) |

295  
296  
297

## 298 **Antibiotic resistance determinants**

299  
300 A total of 25 various classes of AMG and 53 ARG subtypes were detected in the 21 samples. Among  
301 these, two of the genes- *tetQ* and *ermF* were present in 14 out of 21 samples- mainly in the human and  
302 bird samples. Except *tetQ* and *ermF*, *tet(W)* (13/21), *cfxA* (11/21), *tet(40)* (10/21), *tet(0)*(10/21) and *tet32*  
303 (8/21) all other ARG were abundantly present. The bird samples (n=37) had the highest number of ARG,  
304 followed by the human samples (n=27) and the environmental samples (n=16).

305  
306 Human, bird and environmental samples all had mobile genetic element- *intl1*. Genes responsible for  
307 resistance to antimicrobial agent such as fluoroquinolone (*qnrB6*, *qnrS1*, *QRDR*), sulfonamide (*sul1*, *sul2*,  
308 *sul3*), macrolide (*mphK*, *macB*, *macA\_3*, *ereA2*, *ermCd*, *ermQ*, *ermG*, *ermF*, *ermGT*, *ermB*), lincosamide  
309 (*inuB*), kasugamycin (*ksgA*), vancomycin (*vanR*), undecaprenyl pyrophosphate (*bacA*), trimethoprim  
310 (*dfrA*, *dfrXV*, *dfrA14*), chloramphenicol (*catA*, *catQ*, *floR*), polymyxin (*arnA*), aminoglycosides [*aacC3*,  
311 *aac(60)-Ie-aph(200)-Ia*, *aadA*, *aph6*, *ant(3'')*, *ant(4)*, *ant(6)*, *aadB*, *aadE*, *aph(3')-IIIa*, *aph(3')-Ib*],  
312 tetracycline (*tetC*, *tet39*, *tetQ*, *tet32*, *tetW*, *tetM*, *tet40*, *tetA*, *tetL*, *tetB*) and betalactam (*cepA*, *cfxA*, *bla<sub>TEM</sub>*,  
313 *bla<sub>VEB-1</sub>*, *bla<sub>CTX-M</sub>*, *bla<sub>EC</sub>*) antibiotics were detected.

314  
315 Among all the ARG subtypes, genes resistant to aminoglycosides, tetracycline, and beta-lactams were  
316 predominant. In human samples, the dominant ARG belonged to tetracycline resistance genes (*tetQ*,  
317 *tet32*, *tetW*, *tetM*, *tetO*), followed by beta-lactam resistance genes (*cepA*, *cfxA*, *bla<sub>CTX-M</sub>*, *bla<sub>EC</sub>*) and  
318 aminoglycoside resistance genes (*aadE*, *aph(3')-Ib*, *aph6*). In bird samples, the dominant ARG were  
319 aminoglycoside resistance genes [*aacC3*, *aac(60)-Ie-aph(200)-Ia*, *aadA*, *ant(3'')*, *ant(6)*, *aadB*, *aadE*,  
320 *aph(3')- IIIa*, *aph(3')-Ib*], followed by tetracycline resistance genes (*tetQ*, *tet32*, *tetW*, *tetM*, *tet40*, *tetA*,  
321 *tetL*, *tetB*), and erythromycin resistance genes (*ermB*, *ermF*, *ermG*). The environmental samples had high  
322 presence of sulphonamides (*sul1*, *sul2*, *sul3*) and tetracycline [*tetM*, *tetA(39)*, *tetC*]. Despite having the  
323 least number of samples, bird (poultry) samples had the highest number of ARG, while the environmental  
324 samples had the least number of ARG present. (



325 Table 3 and  
326  
327 Figure 4).  
328  
329

330 Table 3: Antimicrobial resistance Genes found in human, bird (poultry) and environmental samples.

| Antimicrobial resistance gene (ARG) | Human | Poultry | Environmental | Antimicrobial resistance gene (ARG) | Human | Poultry | Environmental |
|-------------------------------------|-------|---------|---------------|-------------------------------------|-------|---------|---------------|
| <i>sul1</i>                         | □     | +       | +             | <i>aph6-5</i>                       | +     | □       | +             |
| <i>sul2</i>                         | +     | □       | +             | <i>aph(3'')-Ib</i>                  | +     | +       | +             |
| <i>sul3</i>                         | □     | +       | +             | <i>aph(3')-IIIa</i>                 | □     | +       | □             |
| <i>qnrS6</i>                        | +     | □       | □             | <i>aacC3</i>                        | □     | +       | □             |
| <i>qnrS1</i>                        | +     | +       | □             | <i>aac(6')-Ie/aph(2'')-Ia</i>       | □     | +       | □             |
| <i>QRDR</i>                         | +     | +       | □             | <i>ant3</i>                         | □     | +       | □             |
| <i>macA_3</i>                       | +     | +       | +             | <i>ant6</i>                         | □     | +       | □             |
| <i>macB</i>                         | +     | +       | □             | <i>aadA</i>                         | □     | +       | □             |
| <i>vanR</i>                         | □     | □       | +             | <i>aadB</i>                         | □     | +       | □             |
| <i>mphK</i>                         | +     | □       | □             | <i>aadE</i>                         | +     | +       | □             |
| <i>inuB</i>                         | □     | +       | □             | <i>tet(C)</i>                       | □     | □       | +             |
| <i>ksgA</i>                         | +     | +       | □             | <i>tetA(39)</i>                     | □     | +       | +             |
| <i>ermB</i>                         | □     | +       | □             | <i>tet(40)</i>                      | +     | +       | □             |
| <i>ermF</i>                         | +     | +       | □             | <i>tet(L)</i>                       | □     | +       | □             |
| <i>ermGT</i>                        | +     | □       | □             | <i>tet(B)</i>                       | □     | +       | □             |
| <i>ermG</i>                         | □     | +       | □             | <i>tetQ</i>                         | +     | +       | □             |
| <i>ereA2</i>                        | □     | □       | +             | <i>tetM_like</i>                    | +     | +       | □             |
| <i>dfrXV</i>                        | □     | +       | +             | <i>tet(32)</i>                      | +     | +       | □             |
| <i>dfrA</i>                         | +     | +       | □             | <i>tet(W)</i>                       | +     | +       | □             |
| <i>dfrA14</i>                       | +     | □       | □             | <i>tet(O)</i>                       | +     | □       | □             |
| <i>floR</i>                         | □     | □       | +             | <i>tet(M)</i>                       | +     | +       | +             |
| <i>catA</i>                         | +     | +       | □             | <i>cepA</i>                         | +     | □       | □             |
| <i>catQ</i>                         | □     | □       | +             | <i>bla<sub>CTX-M-1</sub></i>        | +     | □       | □             |
| <i>arnA</i>                         | □     | +       | □             | <i>cfxA</i>                         | +     | □       | □             |
| <i>bacA</i>                         | +     | +       | +             | <i>bla<sub>VEB-1</sub></i>          | □     | □       | +             |
| <i>bla<sub>TEM-137</sub></i>        | □     | +       | □             | <i>bla<sub>EC</sub></i>             | +     | +       | □             |
| <i>classD_beta lactamase</i>        | □     | +       | □             | <i>bla<sub>CTXM-83</sub></i>        | +     | □       | □             |

331 + Presence of ARG

332 – Absence of ARG

333

334

335 The most abundant ARG in some samples (TA340, TA330, TH990, and TH920) are visualized in the  
 336 generated heat-map (

337  
 338 Figure 4a). The highest diversity was observed in TA340 and TA330. As seen in hierarchical clustering  
 339 (dendrogram) (

340  
 341 Figure 4d), the ARG were confined to four main clusters: two clusters were entirely from human samples,  
 342 one from environmental samples and one had ARG common in the human and bird (poultry) samples.  
 343 ARG found in human samples had positive association/correlation except for TH990 and TH920.

344  
 345 Association of ARG in birds and humans were significant as seen in the fourth cluster (F-value=2.187, R-  
 346 squared=0.38456 and P-value=<0.003) (Figure 5c). ARG from the environmental samples, on the other  
 347 hand, appear to be clustering within themselves without any correlation with other samples. The most  
 348 diverse ARG were seen in common quail samples, while soil samples had the least number of ARG  
 349 (Figure 5b). The highest variability of ARG were detected in the human samples (

350  
 351 Figure 4b).

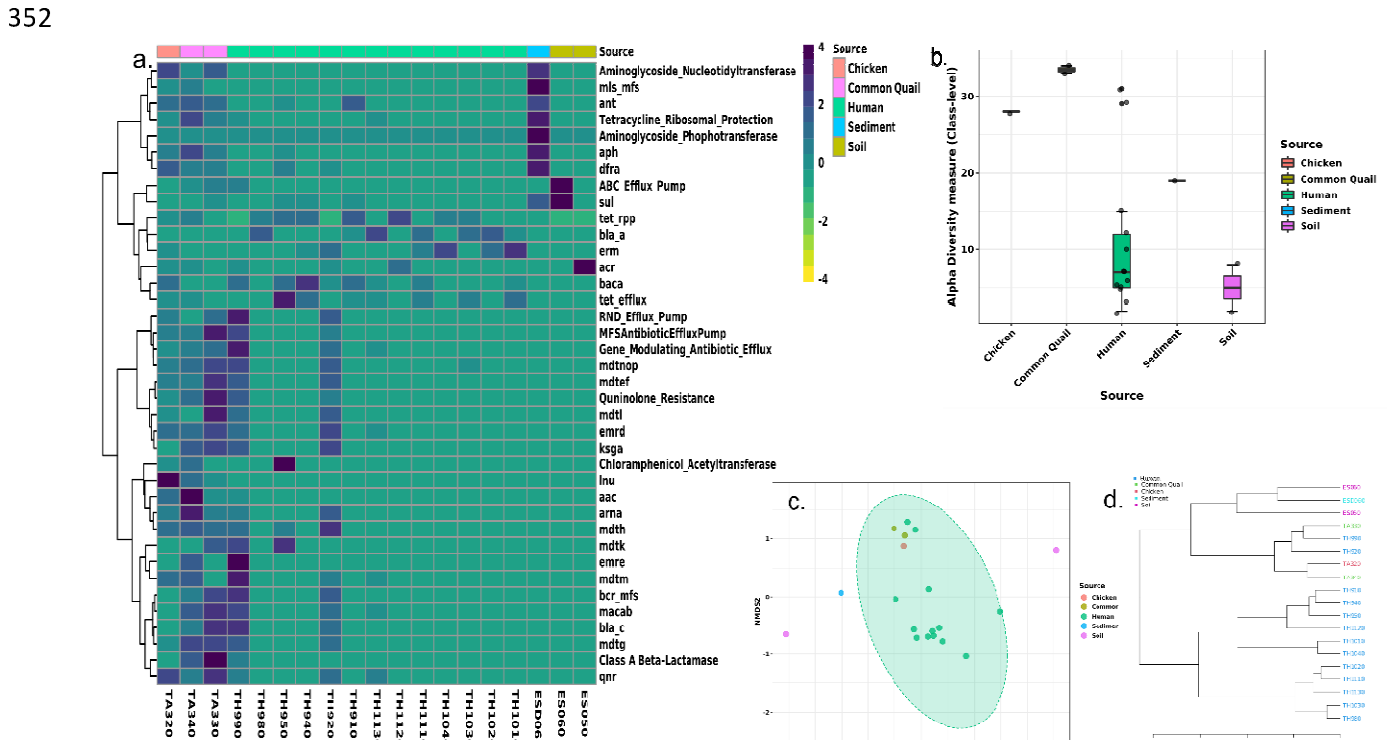

353  
 354

355

356 **Figure 4:** Visualization of ARG profile of various samples obtained from shot-gun sequencing processed  
 357 in SHORTBred pipeline. a) Heat map obtained through cluster analysis of ARG profile of various  
 358 samples and their sources, performed in ARG classified at Class level with clustering distance calculated  
 359 from Bray-Curtis Index under clustering algorithm Ward. b) Alpha diversity analysis of ARG at class  
 360 level, measuring diversity with Shannon. The ARG diversity is significant (P-value= 0.019166) tested  
 361 using ANOVA. c) Ordination analysis and significance testing for significant similarities between the  
 362 different sample types and sources. Non-metric multidimensional scaling (NMDS) ordination method was  
 363 used with Bray-Curtis Index and statistically tested with Permutation MANOVA (PERMANOVA) (F-

364 value=2.187, R-squared=0.38456 and P-value=<0.003). Samples with statistically significant ARG  
365 association are highlighted with light green shade. d) Hierarchical clustering (dendrogram) of various  
366 samples based on the ARG profile. The clustering was performed with algorithm Ward and Bray-Curtis  
367 Index as a distance measure algorithm.

### 368 **Horizontal gene transfer (HGT) events**

369 Environmental bacteria exhibited transference of genes that code for translational enzymes and RNA-  
370 directed DNA polymerase, including genes such as copper resistance proteins B that help in survival on  
371 harsh environmental conditions. Furthermore, genes that code for enzymes such as integrase and  
372 transposase of IS elements of family (*IS3/IS911* and *IS1595*) that might help them in lysogenic  
373 transformation (Antimicrobial resistance, n.d.; Davies and Davies, 2010) were also found along with  
374 genes that code for antimicrobial resistance, transcription regulation, DNA methyltransferase, and  
375 ATPases (Hamner et al., 2019).

376 HGT were also detected in the bird samples- especially with genes that code for proteins of replication  
377 and translation, as well as genes associated with enzymes of various pathways (mannonate dehydratase,  
378 oxidoreductase, peptidyl-prolyl cis/trans isomerases and NADH-azoreductase). In bird (poultry) samples,  
379 integrases and transposons of the *IS66* and *IS21* families that help in AMR transference (Hjelmsø et al.,  
380 2019) were detected. Clindamycin resistance transfer factor BtgB (Supplementary table 3 and Table 5),  
381 which is required for conjugal transfer of the clindamycin resistance gene in *Bacteroides* species (Das et  
382 al., 2020) were also detected.

383 In human samples, most of the commensal bacterial species HGT were detected that code for proteins of  
384 replication, transcription, translation, ion transportation, enzyme regulation, enzymes for various  
385 constitutive and inducive pathways, and enzymes required for bacterial quotidian functions  
386 (Supplementary Table 3). Various genes that code for AMR mechanisms such as ABC multidrug  
387 transport system, multidrug resistance protein (MATE family), VanY domain containing protein,  
388 penicillin binding protein (PBP) 1A, aminoglycoside phosphotransferase, *tetR* protein, and  
389 metalloβ-lactamase domain protein (Table 4) were detected circulating in gut microbiome.  
390 Additionally, ARG that facilitate movement and insertion of these genes were also detected. Genes  
391 associated with integrase and transposase of *IS116/IS110/IS902*, *IS30*, *IS605*, *IS200*, and *IS4* families  
392 were found in the gut commensals (Supplementary table 3 and

393 Table ).

394

395

396 **Table 4:** Various antimicrobial resistance proteins, virulence protein, transposase and integrase that  
 397 translated from genes transferred via HGT between organisms.

| Sample | HGT between organisms                 |                                           | Proteins that translated from genes transferred from HGT            |
|--------|---------------------------------------|-------------------------------------------|---------------------------------------------------------------------|
| TA330  | <i>Bacteroides_coprophilus</i>        | <i>Bacteroides_xylanisolvens</i>          | IS66 family element & transposase                                   |
| TA340  | <i>Prevotella</i>                     | <i>Bacteroides</i>                        | Clindamycin resistance transfer factor BtgB                         |
| TH950  | <i>Eubacterium_eligens</i>            | <i>Clostridium_sp_L2_50</i>               | Transposase, IS200 family                                           |
| TH950  | <i>Roseburia_intestinalis</i>         | <i>Roseburia_inulinivorans</i>            | Transposase IS116/IS110/IS902 family                                |
| TH910  | <i>Faecalibacterium_prausnitzii</i>   | <i>Subdoligranulum_sp_4_3_54</i><br>A2FAA | ABC-type multidrug transport system                                 |
| TH950  | <i>Oribacterium_sp_oral_taxon_078</i> | <i>Roseburia_intestinalis</i>             | Antitoxin; DUF2185 domain-containing protein                        |
| TH1010 | <i>Roseburia_inulinivorans</i>        | <i>Eubacterium_rectale</i>                | Multidrug resistance protein, MATE family                           |
| TH1010 | <i>Bacteroides</i>                    | <i>Prevotella_stercorea</i>               | Transposase, IS116/IS110/IS902 family                               |
| TH1020 | <i>Megamonas_rupellensis</i>          | <i>Megamonas_funiformis</i>               | IS605 OrfB family transposase                                       |
| TH1120 | <i>Ruminococcus_bromii</i>            | <i>Butyrivibrio_crossotus</i>             | Penicillin-binding protein 1A                                       |
| TH1120 | <i>Butyrivibrio_crossotus</i>         | <i>Prevotella_copri</i>                   | Aminoglycoside phosphotransferase                                   |
| TH1130 | <i>Anaerostipes_hadrus</i>            | <i>Clostridiales</i>                      | ABC-type multidrug transport system                                 |
| TH1130 | <i>Ruminococcus</i>                   | <i>Clostridiales</i>                      | VanY domain-containing protein, ABC-type multidrug transport system |
| TH1110 | <i>Veillonella_sp_HPA0037</i>         | <i>Megasphaera_elsdenii</i>               | Transposase IS200-family protein; TetR protein                      |
| ES060  | <i>Pseudoxanthomonas_sp_GW2</i>       | <i>Alcanivorax_pacificus</i>              | Copper resistance protein B                                         |
| ESD060 | <i>Thauera_sp_27</i>                  | <i>Dechloromonas_aromatica</i>            | Integrase, & Transposase IS3/IS911                                  |
| ESD060 | <i>Cupriavidus_sp_HMR_1</i>           | <i>Gammaproteobacteria</i>                | DDE_Tnp_IS1595 domain-containing protein                            |
| TH910  | <i>Ruminococcus_sp_5_I_39BFAA</i>     | <i>Eubacterium_eligens</i>                | Multidrug resistance protein MATE family                            |
| TH950  | <i>Roseburia_intestinalis</i>         | <i>Eubacterium_ramulus</i>                | Transposase IS4 family protein                                      |
| TH950  | <i>Roseburia_inulinivorans</i>        | <i>Eubacterium_rectale</i>                | Transposase IS116/IS110/IS902 family./Transposase                   |
| TH980  | <i>Catenibacterium_mitsuokai</i>      | <i>Clostridiales</i>                      | Transposase, IS605 family                                           |
| TH1030 | <i>Clostridium_sp_ATCC_BAA_442</i>    | <i>Ruminococcus_sp_JC304</i>              | Metallo-beta-lactamase domain protein                               |



## 399 ARG Network Analysis

### 400 Association of ARG types in samples based on relative abundance of genes

401 The association network analysis of ARG in samples (Figure 6) showed strong relationship between the  
402 environmental samples (ES050, ES060, and ESD060) and aminoglycoside phosphotransferase,  
403 aminoglycoside nucleotidyltransferase, sul gene, dfrA gene, acr gene, and ABC efflux pump. In contrast,  
404 bird (poultry) samples (TA340, TA330, and TA320) showed a strong association with the tetracycline  
405 resistance gene (*tet*). Tetracycline resistance gene and tetracycline efflux had the highest association with  
406 most samples. Human samples had strong associations with *bacA*, *erm*, *acr*, *tet*, *tet* efflux, and class A  
407 betalactamase. Samples TA340, TA330, TA320, TH950, and TH920 had the highest number of ARG  
408 genes, as seen in Figure 6.

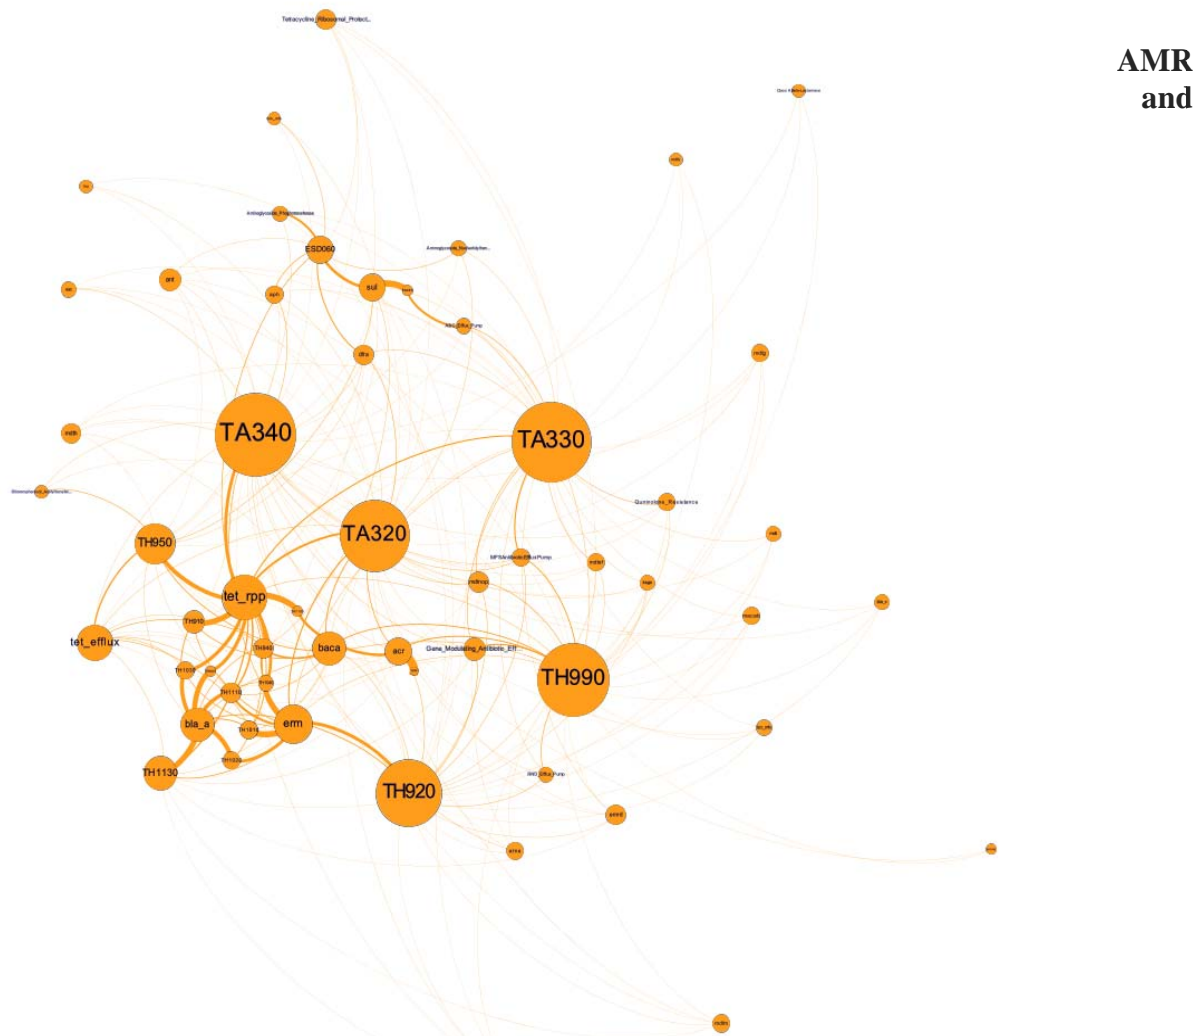

**Figure 5:** Association network analysis of ARG in various samples. The analysis was carried out with abundance data with associated metadata file on Gephi V0.92. The size of the circle represents number and strength of association- larger circle means a greater number of ARGs in the sample and also has more association with ARGs and other samples. The thickness of connections indicates strength of the association.

## 412 taxonomic profile integrative association network analysis

413 Connection between all detected bacteria (at genus level) and ARG (at class level) were assessed using  
414 the MIC (Maximal Information Coefficient) correlation coefficient. In network analysis (Figure 6), only  
415 the strong connections between bacteria to bacteria, bacteria to ARG, and ARG to ARG were visualized.  
416 The strong connections represented MIC values corresponding to pre-calculate  $p$ -values (with  $p < 0.05$ )  
417 based on the total number of samples. Network analysis showed the strongest associating bacteria as  
418 *Eubacterium* and demonstrated strong association between *Eubacterium* and *Faecalibacterium*,  
419 *Eubacterium* and *Roseburia*, *Eubacterium* and *Collinsella*, *Faecalibacterium* and *Lachnospira*,  
420 *Faecalibacterium* and *Bacteroides*. In ARG, the strongly associating ARG seem to be *qnr*, *ermD*, *arnA*,  
421 and *aac*, among the different genera of bacteria. Furthermore, efflux pumps were also found to be present  
422 in a high number and seemed to be strongly associated with *Escherichia*. *Escherichia* seems to be a hub  
423 for most ARG and efflux pumps and almost all ARG are strongly related to genus *Escherichia* (Figure 6).

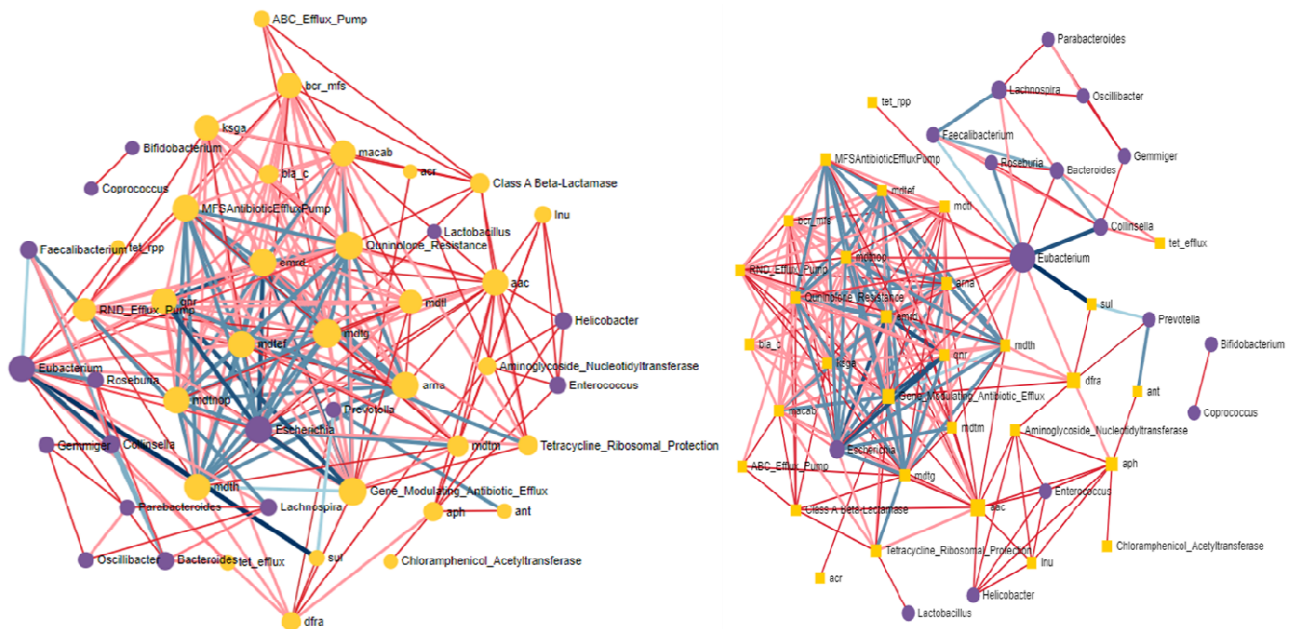

424

425 **Figure 6:** Integrative MIC analysis of ARG and Taxonomic profile of various samples using  
426 ResistoXplorer web platform. The color and shape of nodes are based on the type of data or profile  
427 (Resistome: yellow square; Microbiome: purple circle). In the network, the size of node represents the  
428 network centrality-based measure (degree or betweenness). While the color and width of edges shows the  
429 strength of correlation between them (MIC: varies from 0 to 1). A) Node size is based on Degree while B)  
430 Node size based on betweenness.  
431

432

## 433 Discussion

434

435 AMR has become one of the most pressing issues of public health concern of the 21<sup>st</sup> century (Prestinaci  
436 et al., 2015). Rise of new pathogen (bacteria or viruses) that may lead to emerging and re-emerging  
437 diseases, needs to be surveilled and understood properly (Kelly et al., 2020). Continuous misuse of  
438 antibiotics can lead to multidrug-resistant bacteria or superbugs (Antimicrobial resistance, n.d.). AMR  
439 often develop with same molecular mechanism as emergence of new bacteria (Davies and Davies, 2010;  
440 Bartoli et al., 2016). Recently, utility of metagenomics tool in epidemiological and environmental studies  
441 have been growing (Hamner et al., 2019; Hjelmsø et al., 2019; Das et al., 2020). We have used  
442 metagenomics approach to investigate AMR presence and transfer dynamics in environmental samples  
443 from One Health perspective.

444

445 Taxonomic profile obtained through shotgun sequencing revealed the genus *Prevotella* as most prevalent  
446 bacteria, especially in the human samples (Supplementary Table 1 and Table 2). According to Wu et al.  
447 2011, *Prevotella* spp. are SCFA (short chain fatty acids) producers and can be seen in healthy individuals  
448 consuming high carbohydrate and simple sugars diets (Wu et al., 2011). Since, Nepalese diet is mainly  
449 carbohydrate based, this might explain the dominance of *Prevotella* spp.

450

451 Pathogenic bacteria such as *Shigella*, *Campylobacter*, *Haemophilus* and *E. coli* were detected in various  
452 samples. Virulence genes facilitate the organism to colonize, survive and cause diseases (Thomas and  
453 Wigneshweraraj, 2014). Even a single gene can enhance the pathogenicity- for example, presence of  
454 Shiga toxin coding gene in *E. coli* causes bloody diarrhea and hemolytic uremic syndrome (HUS)  
455 (Sandhu and Gyles, 2002). Detection of virulence genes can often indicate the presence of certain  
456 pathogens- such as *senB* gene for *Shigella flexneri*, *csgG* and *rpoS* genes for *Salmonella enterica* var  
457 typhimurium and *fliR* gene for *Yersinia enterocolitica* (Supplementary table 4). Furthermore, detection of  
458 various virulence genes of *E. coli* such as *astA*, *ltb*, and *lta* (Table 3) can explain the presence of  
459 enterotoxigenic *E. coli* (ETEC) and enteroaggregative *E. coli* (EAEC). Detecting these genes through  
460 metagenomics can indicate the presence of various pathogens which are often missed to be detected using  
461 conventional diagnostic tools (Miller et al., 2019).

462 *Chlamydia gallinacea* which causes slow growth and reduced body mass in chickens was detected in two  
463 poultry samples collected from the backyard farms. Infection with this organism is also known to cause  
464 mild symptoms in humans as well (Salas and de Vega, 2008; Tariq et al., 2020). Additionally,  
465 *Helicobacter pullorum* which causes enteritis in poultry and zoonotic colitis in humans was also detected,  
466 along with *Gallibacterium anatis* that impacts egg production by triggering oophoritis, salpingitis and  
467 peritonitis in hens (Narasinakuppe Krishnegowda et al., 2020; Crisci et al., 2021). These organisms have  
468 yet to be reported in poultry in Nepal. These findings indicate many yet to be detected and identified  
469 pathogens that are floating around in our environment.

470 The viral families detected in this study were mostly *Siphoviridae*, *Podoviridae* and *Myoviridae*. Since  
471 enterobacteria such as *E. coli*, *Klebsiella*, *Shigella*, and gut bacteria like *Bacteroides*, *Prevotella*,  
472 *Roseburia*, *Lachnospira* were mostly present in the samples, phages that infect those bacteria were also  
473 found. Most of the phages that infects genera of *Enterobacteria*, *Prevotella* and *Bacteroides* fall into the  
474 families of *Siphoviridae* (Tariq et al., 2020; Thakali et al., 2021a), *Podoviridae* (Manandhar et al., 2020)  
475 and *Myoviridae* (Salas and de Vega, 2008; Crisci et al., 2021). The Stx-2 converting bacteriophage (Table  
476 2) is phage of much importance. It induces Shiga toxin producing *E. coli* (STEC), which causes diarrhea  
477 and hemolytic uremic syndrome (HUS) in children. STEC produces Shiga toxin and genes encoding this  
478 Shiga toxin are located in the genomes of Stx-2 converting phages which are transferred by the lysogenic  
479 cycle (Acharya et al., 2017; Joshi et al., 2017). This phage was identified in seven samples (human and  
480 poultry). *E. coli* was detected in every sample, which implicates the probability of STEC production in

481 many of these samples (Miller et al., 2019). Interestingly, phages and bacterial diversity were very similar  
482 in most of the samples, with human samples containing highest diversity (Table 1 and Supplementary  
483 table 1 and 2). This indicates that presence of any bacteria in an ecosystem, most likely harbors associated  
484 phages as well (Nayaju et al., 2021).

485 In our study numerous ARG subtypes (n=53) were detected. Some of these genes have been previously  
486 detected in Nepal while others like *inuB*, *catQ*, *ksgA*, *floR*, and *bla<sub>EC</sub>* (Table 3) were detected for the first  
487 time (Acharya et al., 2017; Joshi et al., 2017; Manandhar et al., 2020; Thakali et al., 2021a; Timsina et al.,  
488 2021). *bla<sub>CTX-M</sub>* and *bla<sub>TEM</sub>* were formerly detected from hospital samples (Manandhar et al.,  
489 2020)(Nayaju et al., 2021) as well as environmental samples (Thakali et al., 2020, 2021a). Similarly,  
490 *qnrS*, *sull*, and *tetB* (Thakali et al., 2021a; Young et al., 2022) were detected in samples of animal and  
491 environmental samples whereas *ermB* (Timsina et al., 2021) was detected from samples taken from  
492 school children in Nepal. Other ARG that were mostly detected from clinical samples were *bla<sub>VEB-1</sub>* (Tada  
493 et al., 2017), *tetA* (Nelson et al., 2020), *qnrB*, *dfrA*, *catA* and *sullII* (Manandhar et al., 2022). In Nepal,  
494 tetracycline, neomycin-doxycycline, levofloxacin, enrofloxacin, colistin, tylosin, ampicillin, amoxicillin,  
495 ceftriaxone and gentamicin are most widely prescribed and/or inappropriately used antibiotics. Likewise,  
496 chlortetracycline (CTC), bacitracin methylene disalicylate, tylosine tartarate, lincomycin, neomycin, and  
497 doxycycline are extensively used as feed additives in poultry as growth promoters (Acharya and Wilson,  
498 2019). Over prescription and mishandling of the aforementioned drugs could have led to high presence of  
499 antibiotic resistant genes like *tetC*, *tet39*, *tetQ*, *tet32*, *tetW*, *tetM*, *tet40*, *tetA*, *tetB*, *aacC3*, *aadA*, *aph6*,  
500 *ant(3'')*, *ant(4)*, *ant(6)*, *aadB*, *aadE*, *qnrB6*, *qnrS1*, *mphK*, *macB*, *macA\_3*, *ereA2*, *ermCd*, *ermG*, *ermB*,  
501 *cepA*, *cfxA*, *bla<sub>TEM</sub>*, *bla<sub>VEB-1</sub>*, *bla<sub>CTX-M</sub>*, and *bla<sub>EC</sub>* (Table 3, Figure 6). Among the samples, the highest  
502 ARG subtypes (n=37) were found in poultry samples (n=3) (Table 3 and Figure 5, Figure 6), which could  
503 be because of heavy antibiotics use in poultry farming in Nepal (Acharya and Wilson, 2019). A large  
504 number of ARG subtypes (n=27) were also detected in human samples, perhaps caused by over  
505 prescription, prolonged usage, self-medication practices and easy availability of antibiotics in Nepal  
506 (Dahal and Chaudhary, 2018; Acharya and Wilson, 2019). We detected ARG subtypes *tetQ* and *ermF*  
507 abundantly in human and poultry samples (Table 4 and Figure 5, Figure 6). These genes have been widely  
508 detected in human gut microbiomes (*Bacteroides fragilis* group) and in normal flora of poultry cloacae;  
509 and are found to be circulating among those microbiomes with high HRT activity (Arzese et al., 2000,  
510 Yang et al., 2014 ).

511  
512 Our network analysis showed some strongest association between certain bacteria- *Eubacterium* and  
513 *Faecalibacterium*, *Eubacterium* and *Roseburia*, *Eubacterium* and *Collinesella*, *Faecalibacterium* and  
514 *Lachnospira*, and *Faecalibacterium* and *Bacteroides*. Some strongly associated AMR genes among these  
515 bacteria were *qnr*, *ermD*, *arnA*, and *aac* (Figure 7), with indication of active horizontal transfer dynamics  
516 between human, animal and environmental samples. With two nearby hospitals discharging their  
517 untreated waste into the river, our study might have picked up ARG originating from the hospitals.

518  
519 Many of the ARG detected in our study are known to transcribe for the proteins that help in replication  
520 and executive functioning of bacterial cell (Supplementary Table 4) (Ochman et al., 2000). Some of the  
521 genes that code for ARG (*tetR*, *vanY*, *PBP 1A*, *BtgB*) were mostly associated with gut microbiome  
522 (Penders et al., 2013). In poultry samples, integrases and transposase of *IS66* and *IS21* family that help in  
523 AMR transference (Siguier et al., 2014) were also detected. Similarly, integrase and transposase of  
524 *IS116/IS110/IS902*, *IS30*, *IS605*, *IS200* and *IS4* family were detected in human samples that might help  
525 various bacteria to transport virulence factor, AMR genes and genes that causes overexpression of AMR  
526 genes (Bruton and Chater, 1987; Leskiw et al., 1990; Lysnyansky et al., 2009; Mohammad et al., 2020).

527  
528 Five commensal enteric bacteria were predominately found in healthy human gut of Indian population  
529 (Bag et al., 2019). These bacteria were believed to act as ARG reservoir and could play a significant role  
530 in spreading ARG in enteric pathogens. Various studies also suggest gut microbiome acting as reservoir



531 for AMR and their emergence (Forsberg et al., 2014)(Penders et al., 2013; Langelier et al., 2019;  
532 Carvalho et al., 2022). This might be of enormous epidemiological significance since novel ARG are the  
533 starting point of AMR emergence (Crofts et al., 2017). Metagenomics studies have helped us understand  
534 resistome development in gut microbiome (Miller et al., 2013; Penders et al., 2013). Finding the sources  
535 of ARG are probably the most important step in the fight against AMR.

536  
537 However, working with metagenomic data is challenging and connecting each ARG to its host is still very  
538 difficult (Chiu and Miller, 2019). Thus, clinical metagenomics approach has more accuracy and will be  
539 more applicable in country like Nepal (d’Humières et al., 2021). Furthermore, sampling and preparation  
540 of DNA greatly influence findings in metagenomics analysis; improper DNA prepping might lead to  
541 insufficient genomic coverage of pathogen and ARG (Ruppé et al., 2017).

542  
543 Contemporary AMR surveillance is primarily based on laboratory reporting- focusing on specific  
544 pathogens isolated only from human clinical samples (Weston et al., 2017; Hay et al., 2018). This  
545 conventional way is often lengthy, produces incomparable data and covers narrow pathogen spectrum. It  
546 is also limited and excludes AMR genes present in the commensal flora of an individual (Hendriksen et  
547 al., 2019). Increasing population density, haphazard use of antimicrobial agents, drastic changes in  
548 wildlife habitats, and increasing international travel and trade have increased the threat of AMR related  
549 infections to spread globally (Carroll et al., 2014). Deployment of active global surveillance systems for  
550 early detection of spread of zoonotic and other infectious diseases can mitigate and control outbreaks  
551 (Newell et al., 2010).

552

## 553 **Conclusion**

554  
555 Monitoring and surveillance of infectious diseases using One Health based metagenomics approach can  
556 provide important information on the emerging AMR burden. The ARG profile and antibiotic resistance  
557 (AMR) dynamics, horizontal gene transfer (HGT) events within microbiota, and virulence factor  
558 determination that indicate infection risks are some of the important information needed to truly  
559 understand overall AMR burden. Our study revealed the gut microbiome of both humans and animals can  
560 serve as a reservoir for ARG and through HGT can spillover to other environmental organisms.

561

## 562 **Acknowledgement**

563  
564 We are grateful to NHRC, Government of Nepal for providing us permission to conduct this research. We  
565 thank field team of CMDN led by Mr Bishwo P. Shrestha for their tireless work in collecting samples for  
566 this study. We are also grateful for Massachusetts Institute of Technology (MIT) for providing BioBot  
567 Automatic Sampler that was used for part of the sampling activities.

568

569

570

571

572

573

574

575

576

577

578

579

580

581

582

583

584

585

586

574 **References**

- 575 Aarestrup, F. M. (2015). The livestock reservoir for antimicrobial resistance: a personal view on changing  
576 patterns of risks, effects of interventions and the way forward. *Philos. Trans. R. Soc. London. Ser. B,*  
577 *Biol. Sci.* 370, 20140085. doi: 10.1098/rstb.2014.0085.
- 578 Acharya, K. P., and Wilson, R. T. (2019). Antimicrobial resistance in Nepal. *Front. Med.* 6, 105.
- 579 Acharya, M., Joshi, P. R., Thapa, K., Aryal, R., Kakshapati, T., and Sharma, S. (2017). Detection of  
580 metallo- $\beta$ -lactamases-encoding genes among clinical isolates of *Pseudomonas aeruginosa* in a  
581 tertiary care hospital, Kathmandu, Nepal. *BMC Res. Notes* 10, 1–5. doi: 10.1186/S13104-017-3068-  
582 9/TABLES/1.
- 583 Amplicon analysis with QIIME2 - VL microbiome project (n.d.). Available at:  
584 <https://rachaellappan.github.io/VL-QIIME2-analysis/pre-processing-of-sequence-reads.html>  
585 [Accessed September 8, 2022].
- 586 Anderson, M., Clift, C., Schulze, K., Sagan, A., Nahrgang, S., Ait Ouakrim, D., et al. (2019). *No Title.*  
587 Copenhagen (Denmark).
- 588 Anthony, W. E., Burnham, C. A. D., Dantas, G., and Kwon, J. H. (2021). The Gut Microbiome as a  
589 Reservoir for Antimicrobial Resistance. *J. Infect. Dis.* 223, S209–S213. doi:  
590 10.1093/INFDIS/JIAA497.
- 591 Antimicrobial resistance (n.d.). Available at: [https://www.who.int/news-room/fact-](https://www.who.int/news-room/fact-sheets/detail/antimicrobial-resistance)  
592 [sheets/detail/antimicrobial-resistance](https://www.who.int/news-room/fact-sheets/detail/antimicrobial-resistance) [Accessed October 28, 2022].
- 593 Arzese, A. R., Tomasetig, L., and Botta, G. A. (2000). Detection of tetQ and ermF antibiotic resistance  
594 genes in *Prevotella* and *Porphyromonas* isolates from clinical specimens and resident microbiota of  
595 humans. *J. Antimicrob. Chemother.* 45, 577–582. doi: 10.1093/jac/45.5.577.
- 596 Assefa, Y., Gilks, C. F., Reid, S., van de Pas, R., Gete, D. G., and Van Damme, W. (2022). Analysis of  
597 the COVID-19 pandemic: lessons towards a more effective response to public health emergencies.  
598 *Global. Health* 18, 1–13. doi: 10.1186/S12992-022-00805-9/FIGURES/4.
- 599 Bag, S., Ghosh, T. S., Banerjee, S., Mehta, O., Verma, J., Dayal, M., et al. (2019). Molecular Insights into  
600 Antimicrobial Resistance Traits of Commensal Human Gut Microbiota. *Microb. Ecol.* 77, 546–557.  
601 doi: 10.1007/S00248-018-1228-7.
- 602 Bartoli, C., Roux, F., and Lamichhane, J. R. (2016). Molecular mechanisms underlying the emergence of  
603 bacterial pathogens: an ecological perspective. *Mol. Plant Pathol.* 17, 303. doi:  
604 10.1111/MPP.12284.
- 605 Basseal, J. M., Bennett, C. M., Collignon, P., Currie, B. J., Durrheim, D. N., Leask, J., et al. (2022). Key  
606 lessons from the COVID-19 public health response in Australia. *Lancet Reg. Heal. - West. Pacific*  
607 30, 100616. doi: 10.1016/j.lanwpc.2022.100616.
- 608 Bruton, C. J., and Chater, K. F. (1987). Nucleotide sequence of IS110, an insertion sequence of  
609 *Streptomyces coelicolor* A3(2). *Nucleic Acids Res.* 15, 7053–7065. doi: 10.1093/nar/15.17.7053.
- 610 Burmeister, A. R. (2015). Horizontal Gene Transfer. *Evol. Med. public Heal.* 2015, 193–194. doi:  
611 10.1093/emph/eov018.
- 612 Caporaso, J. G., Lauber, C. L., Walters, W. A., Berg-Lyons, D., Lozupone, C. A., Turnbaugh, P. J., et al.  
613 (2011). Global patterns of 16S rRNA diversity at a depth of millions of sequences per sample. *Proc.*  
614 *Natl. Acad. Sci. U. S. A.* 108 Suppl, 4516–4522. doi: 10.1073/PNAS.1000080107.



- 615 Carroll, S. P., Jørgensen, P. S., Kinnison, M. T., Bergstrom, C. T., Denison, R. F., Gluckman, P., et al.  
616 (2014). Applying evolutionary biology to address global challenges. *Science* 346, 1245993. doi:  
617 10.1126/science.1245993.
- 618 Carvalho, M. J., Sands, K., Thomson, K., Portal, E., Mathias, J., Milton, R., et al. (2022). Antibiotic  
619 resistance genes in the gut microbiota of mothers and linked neonates with or without sepsis from  
620 low- and middle-income countries. *Nat. Microbiol.* 2022 79 7, 1337–1347. doi: 10.1038/s41564-  
621 022-01184-y.
- 622 Chiu, C. Y., and Miller, S. A. (2019). Clinical metagenomics. *Nat. Rev. Genet.* 2019 206 20, 341–355.  
623 doi: 10.1038/s41576-019-0113-7.
- 624 Crisci, M. A., Chen, L.-X., Devoto, A. E., Borges, A. L., Bordin, N., Sachdeva, R., et al. (2021). Closely  
625 related Lak megaphages replicate in the microbiomes of diverse animals. *iScience* 24, 102875. doi:  
626 <https://doi.org/10.1016/j.isci.2021.102875>.
- 627 Crofts, T. S., Gasparini, A. J., and Dantas, G. (2017). Next-generation approaches to understand and  
628 combat the antibiotic resistome. *Nat. Rev. Microbiol.* 15, 422–434. doi:  
629 10.1038/NRMICRO.2017.28.
- 630 d’Humières, C., Salmona, M., Dellière, S., Leo, S., Rodriguez, C., Angebault, C., et al. (2021). The  
631 Potential Role of Clinical Metagenomics in Infectious Diseases: Therapeutic Perspectives. *Drugs*  
632 81, 1453–1466. doi: 10.1007/s40265-021-01572-4.
- 633 Dahal, R. H., and Chaudhary, D. K. (2018). Microbial Infections and Antimicrobial Resistance in Nepal:  
634 Current Trends and Recommendations. *Open Microbiol. J.* 12, 230–242. doi:  
635 10.2174/1874285801812010230.
- 636 Das, B. K., Behera, B. K., Chakraborty, H. J., Paria, P., Gangopadhyay, A., Rout, A. K., et al. (2020).  
637 Metagenomic study focusing on antibiotic resistance genes from the sediments of River Yamuna.  
638 *Gene* 758, 144951. doi: <https://doi.org/10.1016/j.gene.2020.144951>.
- 639 Davies, J., and Davies, D. (2010). Origins and Evolution of Antibiotic Resistance. *Microbiol. Mol. Biol.*  
640 *Rev.* 74, 417. doi: 10.1128/MMBR.00016-10.
- 641 Dhariwal, A., Junges, R., Chen, T., and Petersen, F. C. (2021). ResistoXplorer: a web-based tool for  
642 visual, statistical and exploratory data analysis of resistome data. *NAR Genomics Bioinforma.* 3. doi:  
643 10.1093/NARGAB/LQAB018.
- 644 Domingo, E. (2010). Mechanisms of viral emergence. *Vet. Res.* 41. doi: 10.1051/VETRES/2010010.
- 645 EMP 16S Illumina Amplicon Protocol (n.d.). Available at: <https://www.protocols.io/view/emp-16s-illumina-amplicon-protocol-kqdg3dzzl25z/v1> [Accessed September 8, 2022].
- 647 Fitzpatrick, D., and Walsh, F. (2016). Antibiotic resistance genes across a wide variety of metagenomes.  
648 *FEMS Microbiol. Ecol.* 92, 1–8. doi: 10.1093/FEMSEC/FIV168.
- 649 Forsberg, K. J., Patel, S., Gibson, M. K., Lauber, C. L., Knight, R., Fierer, N., et al. (2014). Bacterial  
650 phylogeny structures soil resistomes across habitats. *Nature* 509, 612–616. doi:  
651 10.1038/nature13377.
- 652 Fouz, N., Pangesti, K. N. A., Yasir, M., Al-Malki, A. L., Azhar, E. I., Hill-Cawthorne, G. A., et al.  
653 (2020). The Contribution of Wastewater to the Transmission of Antimicrobial Resistance in the  
654 Environment: Implications of Mass Gathering Settings. *Trop. Med. Infect. Dis.* 5. doi:  
655 10.3390/TROPICALMED5010033.

- 656 Gibbons, C. L., Mangen, M.-J. J., Plass, D., Havelaar, A. H., Brooke, R. J., Kramarz, P., et al. (2014).  
657 Measuring underreporting and under-ascertainment in infectious disease datasets: a comparison of  
658 methods. *BMC Public Health* 14, 147. doi: 10.1186/1471-2458-14-147.
- 659 GitHub - biobakery/shortbred: ShortBRED is a pipeline to take a set of protein sequences, reduce them to  
660 a set of unique identifying strings (“markers”), and then search for these markers in metagenomic  
661 data and determine the presence and abundance of the (n.d.).
- 662 GitHub - biobakery/waafle: WAAFLE (a Workflow to Annotate Assemblies and Find LGT Events) is a  
663 method for finding novel LGT (Lateral Gene Transfer) events in assembled metagenomes, including  
664 those from human microbiomes. (n.d.). Available at: <https://github.com/biobakery/waafle> [Accessed  
665 January 30, 2023].
- 666 Guo, J., Li, J., Chen, H., Bond, P. L., and Yuan, Z. (2017). Metagenomic analysis reveals wastewater  
667 treatment plants as hotspots of antibiotic resistance genes and mobile genetic elements. *Water Res.*  
668 123, 468–478. doi: 10.1016/j.watres.2017.07.002.
- 669 Hamner, S., Brown, B. L., Hasan, N. A., Franklin, M. J., Doyle, J., Eggers, M. J., et al. (2019).  
670 Metagenomic Profiling of Microbial Pathogens in the Little Bighorn River, Montana. *Int. J.*  
671 *Environ. Res. Public Health* 16. doi: 10.3390/IJERPH16071097.
- 672 Hay, S. I., Rao, P. C., Dolecek, C., Day, N. P. J., Stergachis, A., Lopez, A. D., et al. (2018). Measuring  
673 and mapping the global burden of antimicrobial resistance. 1–3.
- 674 Hendriksen, R. S., Munk, P., Njage, P., Bunnik, B. Van, McNally, L., Lukjancenko, O., et al. (2019).  
675 Global monitoring of antimicrobial resistance based on metagenomics analyses of urban sewage.  
676 doi: 10.1038/s41467-019-08853-3.
- 677 Hjelmsø, M. H., Møllerup, S., Jensen, R. H., Pietroni, C., Lukjancenko, O., Schultz, A. C., et al. (2019).  
678 Metagenomic analysis of viruses in toilet waste from long distance flights—A new procedure for  
679 global infectious disease surveillance. *PLoS One* 14, e0210368. doi:  
680 10.1371/JOURNAL.PONE.0210368.
- 681 Joshi, P. R., Acharya, M., Kakshapati, T., Leungtongkam, U., and Thummeepak, R. (2017). genes of  
682 *Acinetobacter baumannii* isolated from Nepal: antimicrobial resistance and clinical significance.  
683 *Antimicrob. Resist. Infect. Control* 6, 1–7. doi: 10.1186/s13756-017-0180-5.
- 684 Kaminski, J., Gibson, M. K., Franzosa, E. A., Segata, N., Dantas, G., and Huttenhower, C. (2015). High-  
685 Specificity Targeted Functional Profiling in Microbial Communities with ShortBRED. *PLOS*  
686 *Comput. Biol.* 11, e1004557. doi: 10.1371/JOURNAL.PCBI.1004557.
- 687 Kelly, T. R., Machalaba, C., Karesh, W. B., Crook, P. Z., Gilardi, K., Nziza, J., et al. (2020).  
688 Implementing One Health approaches to confront emerging and re-emerging zoonotic disease  
689 threats: lessons from PREDICT. *One Heal. Outlook* 2020 21 2, 1–7. doi: 10.1186/S42522-019-  
690 0007-9.
- 691 Langelier, C., Graves, M., Kalantar, K., Caldera, S., Durrant, R., Fisher, M., et al. (2019). Microbiome  
692 and Antimicrobial Resistance Gene Dynamics in International Travelers. *Emerg. Infect. Dis.* 25,  
693 1380–1383. doi: 10.3201/EID2507.181492.
- 694 Leskiw, B. K., Mevarech, M., Barritt, L. S., Jensen, S. E., Henderson, D. J., Hopwood, D. A., et al.  
695 (1990). Discovery of an insertion sequence, IS116, from *Streptomyces clavuligerus* and its  
696 relatedness to other transposable elements from actinomycetes. *J. Gen. Microbiol.* 136, 1251–1258.  
697 doi: 10.1099/00221287-136-7-1251.
- 698 Liu, Y., Shen, W., Sun, Y., Lv, N., Sun, K., Hu, L., et al. (2020). Virulence-related gene distribution

- 699 among shigella isolates in Anhui, China: The association with antimicrobial resistance. *Infect. Drug*  
700 *Resist.* 13, 3637–3647. doi: 10.2147/IDR.S274862.
- 701 Lysnyansky, I., Calcutt, M. J., Ben-Barak, I., Ron, Y., Levisohn, S., Methé, B. A., et al. (2009).  
702 Molecular characterization of newly identified IS3, IS4 and IS30 insertion sequence-like elements in  
703 *Mycoplasma bovis* and their possible roles in genome plasticity. *FEMS Microbiol. Lett.* 294, 172–  
704 182. doi: 10.1111/j.1574-6968.2009.01562.x.
- 705 Maluta, R. P., Leite, J. L., Rojas, T. C. G., Scaletsky, I. C. A., Guastalli, E. A. L., Ramos, M. de C., et al.  
706 (2017). Variants of astA gene among extra-intestinal *Escherichia coli* of human and avian origin.  
707 *FEMS Microbiol. Lett.* 364. doi: 10.1093/femsle/fnw285.
- 708 Manandhar, S., Nguyen, Q., Nguyen Thi Nguyen, T., Pham, D. T., Rabaa, M. A., Dongol, S., et al.  
709 (2022). Genomic epidemiology, antimicrobial resistance and virulence factors of *Enterobacter*  
710 *cloacae* complex causing potential community-onset bloodstream infections in a tertiary care  
711 hospital of Nepal. *JAC-antimicrobial Resist.* 4, dlac050. doi: 10.1093/jacamr/dlac050.
- 712 Manandhar, S., Zellweger, R. M., Maharjan, N., Dongol, S., Prajapati, K. G., Thwaites, G., et al. (2020).  
713 A high prevalence of multi-drug resistant Gram-negative bacilli in a Nepali tertiary care hospital and  
714 associated widespread distribution of Extended-Spectrum Beta-Lactamase (ESBL) and  
715 carbapenemase-encoding genes. *Ann. Clin. Microbiol. Antimicrob.* 19, 48. doi: 10.1186/S12941-  
716 020-00390-Y.
- 717 MetaPhlAn 3.0 · biobakery/MetaPhlAn Wiki · GitHub (n.d.).
- 718 Miller, R. R., Montoya, V., Gardy, J. L., Patrick, D. M., and Tang, P. (2013). Metagenomics for pathogen  
719 detection in public health. *Genome Med.* 5, 81. doi: 10.1186/gm485.
- 720 Miller, S., Naccache, S. N., Samayoa, E., Messacar, K., Arevalo, S., Federman, S., et al. (2019).  
721 Laboratory validation of a clinical metagenomic sequencing assay for pathogen detection in  
722 cerebrospinal fluid. *Genome Res.* 29, 831–842. doi: 10.1101/GR.238170.118.
- 723 Mohammad, R., Erik, K., Carl-Fredrik, F., Joakim, L. D. G., and M., L. T. (2020). The Association  
724 between Insertion Sequences and Antibiotic Resistance Genes. *mSphere* 5, e00418-20. doi:  
725 10.1128/mSphere.00418-20.
- 726 Murray, C. J., Ikuta, K. S., Sharara, F., Swetschinski, L., Robles Aguilar, G., Gray, A., et al. (2022a).  
727 Global burden of bacterial antimicrobial resistance in 2019: a systematic analysis. *Lancet* 399, 629–  
728 655. doi: 10.1016/S0140-6736(21)02724-0.
- 729 Murray, C. J., Ikuta, K. S., Sharara, F., Swetschinski, L., Robles Aguilar, G., Gray, A., et al. (2022b).  
730 Global burden of bacterial antimicrobial resistance in 2019: a systematic analysis. *Lancet* 399, 629–  
731 655. doi: 10.1016/S0140-6736(21)02724-0.
- 732 Narasinakuppe Krishnegowda, D., Dhama, K., Kumar Mariappan, A., Munuswamy, P., Iqbal Yattoo, M.,  
733 Tiwari, R., et al. (2020). Etiology, epidemiology, pathology, and advances in diagnosis, vaccine  
734 development, and treatment of *Gallibacterium anatis* infection in poultry: a review. *Vet. Q.* 40, 16–  
735 34. doi: 10.1080/01652176.2020.1712495.
- 736 Nayaju, T., Upreti, M., Ghimire, A., Shrestha, B., Maharjan, B., Joshi, R., et al. (2021). Higher  
737 Prevalence of Extended Spectrum  $\beta$ -Lactamase Producing Uropathogenic *Escherichia coli* Among  
738 Patients with Diabetes from a Tertiary Care Hospital of Kathmandu, Nepal. *Am. J. Trop. Med. Hyg.*  
739 105. doi: 10.4269/ajtmh.21-0691.
- 740 Nelson, A., Manandhar, S., Ruzante, J., Gywali, A., Dhakal, B., Dulal, S., et al. (2020). Antimicrobial  
741 drug resistant non-typhoidal *Salmonella enterica* in commercial poultry value chain in Chitwan,

- 742 Nepal. *One Heal. Outlook* 2, 18. doi: 10.1186/s42522-020-00025-4.
- 743 Newell, D. G., Koopmans, M., Verhoef, L., Duizer, E., Aidara-Kane, A., Sprong, H., et al. (2010). Food-  
744 borne diseases - the challenges of 20 years ago still persist while new ones continue to emerge. *Int.*  
745 *J. Food Microbiol.* 139 Suppl, S3-15. doi: 10.1016/j.jfoodmicro.2010.01.021.
- 746 Ochman, H., Lawrence, J. G., and Groisman, E. A. (2000). Lateral gene transfer and the nature of  
747 bacterial innovation. *Nature* 405, 299–304. doi: 10.1038/35012500.
- 748 Penders, J., Stobberingh, E. E., Savelkoul, P. H. M., and Wolfs, P. F. G. (2013). The human microbiome  
749 as a reservoir of antimicrobial resistance. *Front. Microbiol.* 4, 1–7. doi: 10.3389/fmicb.2013.00087.
- 750 Prestinaci, F., Pezzotti, P., and Pantosti, A. (2015). Antimicrobial resistance: a global multifaceted  
751 phenomenon. *Pathog. Glob. Health* 109, 309. doi: 10.1179/2047773215Y.0000000030.
- 752 Razavi, M., Marathe, N. P., Gillings, M. R., Flach, C. F., Kristiansson, E., and Joakim Larsson, D. G.  
753 (2017). Discovery of the fourth mobile sulfonamide resistance gene. *Microbiome* 5, 160. doi:  
754 10.1186/S40168-017-0379-Y/FIGURES/4.
- 755 Ruppé, E., Lazarevic, V., Girard, M., Mouton, W., Ferry, T., Laurent, F., et al. (2017). Clinical  
756 metagenomics of bone and joint infections: a proof of concept study. *Sci. Rep.* 7. doi:  
757 10.1038/S41598-017-07546-5.
- 758 Salas, M., and de Vega, M. (2008). “Replication of Bacterial Viruses,” in, eds. B. W. J. Mahy and M. H.  
759 V. B. T.-E. of V. (Third E. Van Regenmortel (Oxford: Academic Press), 399–406. doi:  
760 <https://doi.org/10.1016/B978-012374410-4.00748-2>.
- 761 Sandhu, K. S., and Gyles, C. L. (2002). Pathogenic Shiga toxin-producing *Escherichia coli* in the intestine  
762 of calves. *Can. J. Vet. Res. = Rev. Can. Rech. Vet.* 66, 65–72.
- 763 Schlager, R., Chiu, C. Y., Miller, S., Procop, G. W., and Weinstock, G. (2017). Validation of  
764 Metagenomic Next-Generation Sequencing Tests for Universal Pathogen Detection. *Arch. Pathol.*  
765 *Lab. Med.* 141, 776–786. doi: 10.5858/ARPA.2016-0539-RA.
- 766 Sharma, A. K., Dhasmana, N., Dubey, N., Kumar, N., Gangwal, A., Gupta, M., et al. (2017). Bacterial  
767 Virulence Factors: Secreted for Survival. *Indian J. Microbiol.* 57, 1–10. doi: 10.1007/s12088-016-  
768 0625-1.
- 769 Siguier, P., Gourbeyre, E., and Chandler, M. (2014). Bacterial insertion sequences: their genomic impact  
770 and diversity. *FEMS Microbiol. Rev.* 38, 865–891. doi: 10.1111/1574-6976.12067.
- 771 Sorbara, M. T., and Pamer, E. G. (2019). Interbacterial mechanisms of colonization resistance and the  
772 strategies pathogens use to overcome them. *Mucosal Immunol.* 12. doi: 10.1038/S41385-018-0053-  
773 0.
- 774 Sun, D., Jeannot, K., Xiao, Y., and Knapp, C. W. (2019). Editorial: Horizontal gene transfer mediated  
775 bacterial antibiotic resistance. *Front. Microbiol.* 10, 1933. doi:  
776 10.3389/FMICB.2019.01933/BIBTEX.
- 777 Tada, T., Shimada, K., Satou, K., Hirano, T., Pokhrel, B. M., Sherchand, J. B., et al. (2017). *Pseudomonas*  
778 *aeruginosa* Clinical Isolates in Nepal Coproducing Metallo- $\beta$ -Lactamases and 16S rRNA  
779 Methyltransferases. *Antimicrob. Agents Chemother.* 61. doi: 10.1128/AAC.00694-17.
- 780 Tariq, M. A., Newberry, F., Haagmans, R., Booth, C., Wileman, T., Hoyles, L., et al. (2020). Genome  
781 Characterization of a Novel Wastewater *Bacteroides fragilis* Bacteriophage (vB\_BfrS\_23) and its  
782 Host GB124. *Front. Microbiol.* 11. doi: 10.3389/fmicb.2020.583378.

- 783 Thakali, O., Malla, B., Tandukar, S., Sthapit, N., Raya, S., Furukawa, T., et al. (2021a). Release of  
784 antibiotic-resistance genes from hospitals and a wastewater treatment plant in the kathmandu valley,  
785 Nepal. *Water (Switzerland)* 13, 1–11. doi: 10.3390/w13192733.
- 786 Thakali, O., Malla, B., Tandukar, S., Sthapit, N., Raya, S., Furukawa, T., et al. (2021b). Release of  
787 antibiotic-resistance genes from hospitals and a wastewater treatment plant in the kathmandu valley,  
788 Nepal. *Water (Switzerland)* 13, 2733. doi: 10.3390/W13192733/S1.
- 789 Thakali, O., Tandukar, S., Brooks, J., Sherchan, S., Sherchand, J., and Haramoto, E. (2020). The  
790 Occurrence of Antibiotic Resistance Genes in an Urban River in Nepal. *Water* 12, 450. doi:  
791 10.3390/w12020450.
- 792 Thomas, M. S., and Wigneshweraraj, S. (2014). Regulation of virulence gene expression. *Virulence* 5,  
793 832–834. doi: 10.1080/21505594.2014.995573.
- 794 Timsina, R., Shrestha, U., Singh, A., and Timalisina, B. (2021). Inducible clindamycin resistance and erm  
795 genes in *Staphylococcus aureus* in school children in Kathmandu, Nepal. *Futur. Sci. OA* 7. doi:  
796 10.2144/FSOA-2020-0092.
- 797 Vieira, P. C. G., Espinoza-Culupú, A. O., Nepomuceno, R., Alves, M. R., Lebrun, I., Elias, W. P., et al.  
798 (2020). Secreted autotransporter toxin (Sat) induces cell damage during enteroaggregative  
799 *Escherichia coli* infection. *PLoS One* 15, e0228959. doi: 10.1371/journal.pone.0228959.
- 800 Weston, E. J., Wi, T., and Papp, J. (2017). Strengthening Global Surveillance for Antimicrobial Drug-  
801 Resistant *Neisseria gonorrhoeae* through the Enhanced Gonococcal Antimicrobial Surveillance  
802 Program. *Emerg. Infect. Dis.* 23, S47–S52. doi: 10.3201/eid2313.170443.
- 803 WHO (2015). WHO Library Cataloguing-in-Publication Data Global Action Plan on Antimicrobial  
804 Resistance. *Microbe Mag.* 10, 354–355. Available at: [www.paprika-annecy.com](http://www.paprika-annecy.com) [Accessed March  
805 2, 2023].
- 806 Wu, G. D., Chen, J., Hoffmann, C., Bittinger, K., Chen, Y. Y., Keilbaugh, S. A., et al. (2011). Linking  
807 long-term dietary patterns with gut microbial enterotypes. *Science (80-. )*. 334, 105–108. doi:  
808 10.1126/science.1208344.
- 809 Xu, J., Xu, Y., Wang, H., Guo, C., Qiu, H., He, Y., et al. (2015). Occurrence of antibiotics and antibiotic  
810 resistance genes in a sewage treatment plant and its effluent-receiving river. *Chemosphere* 119,  
811 1379–1385. doi: 10.1016/J.CHEMOSPHERE.2014.02.040.
- 812 Yang, Q., Ren, S., Niu, T., Guo, Y., Qi, S., Han, X., et al. (2014). Distribution of antibiotic-resistant  
813 bacteria in chicken manure and manure-fertilized vegetables. *Environ. Sci. Pollut. Res. Int.* 21,  
814 1231–1241. doi: 10.1007/S11356-013-1994-1.
- 815 Young, C. C. W., Karmacharya, D., Bista, M., Sharma, A. N., Goldstein, T., Mazet, J. A. K., et al. (2022).  
816 Antibiotic resistance genes of public health importance in livestock and humans in an informal  
817 urban community in Nepal. *Sci. Rep.* 12, 13808. doi: 10.1038/s41598-022-14781-y.

818

819



## 820 **Figures**

821 Figure 7 Visualization of sampling site of this study i- Thapathali temporary settlement. The map was  
822 created using QGIS (an open source GIS platform) using basemaps from OpenStreetMap (25) and shape  
823 files from OpendataNepal.com (26)

824 Figure 8 Bioinformatics data analysis workflow used in this study.

825 Figure 9 Bar plot showing all Bacterial phylum classification in various samples according to a. 16s  
826 rRNA sequencing and b. Shotgun sequencing which was obtained from MetaPhlan V2.0. The plots were  
827 generated using ggplot2 in R studio 2022.07.1 Build 554

828 Figure 10 Prevalence of virus family in the samples obtained from Metagenomic sequencing data. a.  
829 Family wise distribution of viruses (phage) detected b. Bar plot of all the different types of phages  
830 detected in different samples, The bar plot was generated using ggplot2 in R studio 2022.07.1 Build 554  
831 with R version 4.2.0.

832 Figure 11 Visualization of ARG profile of different samples obtained from shot-gun sequencing obtained  
833 from SHORTBred pipeline. a) Heat map clustering analysis of ARG profile of different samples with  
834 their sources, performed on ARG classified at Class level with clustering distance calculated from Bray-  
835 Curtis Index under clustering algorithm Ward. b) Alpha diversity analysis of ARG's performed at class  
836 level (class of ARG) while measuring diversity with Shannon. The ARG diversity is significant with P-  
837 value of 0.019166 tested using ANOVA. c) Ordination analysis and significance testing for significant  
838 similarities between the different sample type and different sample sources. Non-metric multidimensional  
839 scaling (NMDS) ordination method was used with Bray-Curtis Index and statistically tested with  
840 permutational MANOVA (PERMANOVA) (F-value=2.187, R-squared=0.38456 and P-value=<0.003).  
841 Samples with statistically significant ARG association are highlighted with light green shade. d)  
842 Hierarchical clustering (dendrogram) of different samples based on the ARG profile found on them. The  
843 clustering was performed with algorithm Ward and Bray-Curtis Index as a distance measure algorithm.

844 Figure 12 Association network analysis of ARG with samples. The analysis was carried out with  
845 abundance data with associated metadata file on Gephi V0.92. The size of the circle represents number  
846 and strength of association- larger circle means a greater number of ARGs in the sample and also has  
847 more association with ARGs and other samples. The thickness of connections indicates strength of the  
848 association.

849 Figure 13 Integrative analysis of AMR gene and Taxonomic profile of different samples performed with  
850 MIC analysis for association network analysis using ResistoXplorer web platform. The color and shape of  
851 nodes are based on the type of data or profile (Resistome: yellow square; Microbiome: purple circle). In  
852 the network, the size of node represents the network centrality-based measure (degree or betweenness).  
853 While the color and width of edges shows the strength of correlation between them (MIC: varies from 0  
854 to 1). A) Node size is based on Degree while B) Node size based on Betweenness

855

856 **Tables**

857 Table 1 Taxonomic profile of Viruses (phage) of different samples from metagenomic sequencing data  
858 obtained with relative abundance of  $\geq 10$ .

859 Table 2 Toxin coding genes and their subsequent bacteria detected with ShortBRED tool.

860 Table 3 Antimicrobial resistance Genes found in human, poultry and environmental samples.

861 Table 4 Various antimicrobial resistance proteins, virulence protein, transposase and integrase that  
862 translated from genes transferred via HGT between organisms.

863

864 Supplementary table caption

865 Supplementary Table 1: List of Bacterial species found in different samples via NGS sequencing

866 Supplementary Table 2: List of Bacteria found in different samples via 16s rRNA sequencing

867 Supplementary Table 3: Proteins transferred in HGT between two clades of bacteria

868 Supplementary Table 4: Virulence factors detected from Metagenomic sequencing data obtained from  
869 ShortBRED with their function and source (sample type).

870 Supplementary Table 5: Samples and its detail that was collected from Thapathali temporary settlement  
871 for this study.
